# Supplementary material for: Spatiotemporal dissection of the Golgi apparatus and the ER-Golgi intermediate compartment in budding yeast
Source: eLife. 2024 Mar 19;13:e92900. doi: 10.7554/eLife.92900 (PMC10950332; doi:10.7554/eLife.92900)
Supplement: Figure 1—source data 1. [file elife-92900-fig1-data1.xlsx]

## Sheet: Figure 1D
Figure 1D
	EGFP-Emp46										Mnn9-mCherry
Time (s)	Cisterna 1	Cisterna 2	Cisterna 3	Cisterna 4	Cisterna 5	Cisterna 6	Cisterna 7	Cisterna 8	Cisterna 9	Cisterna 10	Cisterna 1	Cisterna 2	Cisterna 3	Cisterna 4	Cisterna 5	Cisterna 6	Cisterna 7	Cisterna 8	Cisterna 9	Cisterna 10
-40		0.462694			1	0.437609						0.153208			0.008988	0.284173
-35		0.89988			0.895866	0.30473				0.195105		0.189474			0.171651	0.080003				0.172765
-30		0.972431			0.981764	0.768019		0.591826		0.448035		0.183736			0.161801	0.517338		0.138987		0.190023
-25	0.343279	0.949774	0.716		0.667037	1		0.607693	0.355264	0.56401	0.012948	0.220278	0.535852		0.143248	0.766286		0.302042	0.155152	0.240685
-20	0.498394	0.918759	1		0.402899	0.953302	0.364326	0.86992	0.768259	0.804386	0.054399	0.491163	0.72822		0.126414	0.439468	0.160756	0.276774	0.401718	0.280228
-15	1	0.124848	0.867612	0.938855	0.432975	0.854382	0.622094	0.896126	0.851235	1	0.109236	0.595479	0.862171	0.244704	0.350159	0.458755	0.360693	0.292536	0.585468	0.473879
-10	0.454045	1	0.596391	0.883512	0.768568	0.82878	0.321374	1	0.866775	0.696892	0.103329	0.804668	0.604109	0.218135	0.419337	0.308187	0.587809	0.435442	0.687486	0.39402
-5	0.804158	0.693178	0.31759	1	0.607278	0.715723	0.487212	0.586899	0.797681	0.703125	0.391718	0.661779	0.943846	0.486501	0.277381	0.575675	0.569627	0.413189	0.734735	0.442571
0	0.868191	0.124255	0.457516	0.643284	0.32027	0.329674	1	0.752691	1	0.49438	0.353437	0.642101	0.778299	0.279383	0.39796	0.513622	0.965628	0.77435	1	0.764308
5	0.350366	0.106094	0.207128	0.634791	0.407435	0.138997	0.517401	0.573285	0.72016	0.312099	0.403881	0.684256	0.857022	0.758825	0.550688	0.669694	1	0.787547	0.784801	0.718722
10	0.388025	0.039632	0.311207	0.393776	0.382582	0.114029	0.496189	0.333704	0.525599	0.190638	0.376809	0.93943	0.885136	1	0.370343	0.768552	0.755163	1	0.775847	0.868543
15	0.34948	0.135932	0.180254	0.712861	0.296507	0.070586	0.140781	0.127101	0.265026	0.127942	0.638365	1	0.947546	0.853516	0.432582	0.91837	0.602648	0.735598	0.784484	1
20	0.142821	0.338711	0.334361	0.817893	0.162437	0.056524	0.215096	0.172617	0.235393	0.085404	1	0.389335	0.847141	0.411688	0.253621	0.826535	0.707994	0.713949	0.698787	0.724323
25	0.133235	0.035521	0.146275	0.403249	0.241237	0.040313	0.082814	0.215785	0.54753	0.037802	0.812139	0.432701	1	0.311065	0.457771	0.859075	0.742327	0.729592	0.945259	0.879974
30	0.027396	0.22018	0.21048	0.296697	0.235152	0.048819	0.112993	0.062831	0.352844	0.065953	0.482568	0.227868	0.445722	0.519097	0.543416	1	0.894735	0.747662	0.62135	0.655035
35	0.082167	0.044825	0.111487	0.121078	0.322146	0.017943	0.068647	0.046528	0.08969	0.042351	0.435752	0.208372	0.59771	0.288189	0.612797	0.610719	0.527333	0.256566	0.425205	0.44465
40	0.012827		0.154198	0.316956	0.224851	0.086696	0.093754		0.113153	0.081768	0.639079		0.645715	0.560275	1	0.843276	0.505688		0.257693	0.775469
45	0.019431		0.04214	0.363134	0.179686	0.060728	0.363937		0.087626	0.242323	0.760841		0.752273	0.752961	0.791961	0.684332	0.440549		0.52803	0.406359
50	0.055692		0.137457		0.203511	0.047286	0.07856		0.041956	0.3227	0.478244		0.657703		0.819307	0.800695	0.382778		0.237436	0.273485
55	0.044263		0.311674		0.266545	0.128324	0.055455				0.480106		0.709931		0.800469	0.446474	0.402096
60	0.091839		0.1301		0.309107	0.013266	0.062161				0.368455		0.733269		0.88799	0.426285	0.336396
65			0.06795		0.188431	0.042554	0.172254						0.263421		0.465078	0.176301	0.152304

## Sheet: Figure 1I
Figure 1I
	EGFP-Ypt1										Mnn9-mCherry
Time (s)	Cisterna 1	Cisterna 2	Cisterna 3	Cisterna 4	Cisterna 5	Cisterna 6	Cisterna 7	Cisterna 8	Cisterna 9	Cisterna 10	Cisterna 1	Cisterna 2	Cisterna 3	Cisterna 4	Cisterna 5	Cisterna 6	Cisterna 7	Cisterna 8	Cisterna 9	Cisterna 10
-45	0.059939		0.786941				0.25069		0.230829		0.015812		0.000718				0.000794		0.016879
-40	0.420961		0.9902				0.550035		0.185891		0.009672		0.010545				0.002309		0.038298
-35	0.725495		0.569944		0.062686	0.192243	0.572561	0.077007	0.611822		0.060409		0.000382		0.023997	0.003433	0.003558	0.039118	0.066645
-30	0.695496		0.923534		0.122414	0.896713	0.401971	0.143271	0.609817		0.054333		0.003738		0.008001	0.016772	0.351113	0.094984	0.059801
-25	1		0.669745	0.02516	0.168685	0.85534	0.707433	0.356253	0.811578		0.022142		0.002999	0.011274	0.044099	0.126308	0.300443	0.146572	0.234648
-20	0.911966		1	0.866639	0.306437	1	1	1	0.998346	0.150629	0.184135		0.001211	0.030083	0.113181	0.076951	0.171819	0.511046	0.399133	0.11907
-15	0.895543	0.301446	0.536518	1	0.326883	0.730461	0.648007	0.491047	0.883323	0.240172	0.164748	0.109147	0.056174	0.063032	0.064479	0.249219	0.141869	0.19988	0.566518	0.072685
-10	0.853495	1	0.545875	0.725165	0.66537	0.404905	0.651906	0.739533	0.990628	0.569527	0.244154	0.554456	0.436152	0.17249	0.204722	0.616032	0.205754	0.522572	0.554507	0.22008
-5	0.798257	0.792129	0.427069	0.166432	1	0.435993	0.474938	0.656122	1	1	0.493687	0.455875	0.715381	0.491119	0.554459	0.487056	0.271554	0.585385	0.906123	0.176648
0	0.885507	0.778187	0.393753	0.391512	0.851964	0.42946	0.457239	0.236897	0.558455	0.670303	0.692008	0.784953	0.958249	0.237617	0.579341	0.471222	0.445922	0.624224	0.919243	0.378872
5	0.949562	0.373108	0.049544	0.191923	0.904801	0.413815	0.007278	0.062616	0.058635	0.649556	0.733113	0.970744	0.68653	0.705779	1	0.843466	0.365737	0.911611	0.905204	1
10	0.595502	0.299965	0.200476	0.172917	0.936295	0.059233	0.027684	0.030041	0.148094	0.524205	0.775107	1	0.874002	0.737952	0.791928	0.929946	0.49674	0.904658	1	0.721871
15	0.279176	0.001481	0.027534	0.108797	0.822167	0.011924	0.030459	0.010542	0.426956	0.088646	0.860368	0.600746	0.738886	1	0.256004	0.958633	0.656703	0.920434	0.833946	0.528707
20	0.226278	0.007135	0.005682	0.211163	0.561549	0.122431	0.377907	0.049895	0.210248	0.161733	0.878207	0.759808	1	0.998054	0.274261	1	1	0.530692	0.803139	0.660037
25	0.059711	0.069595	0.002713	0.065578	0.325198	0.065453	0.044187	0.18033	0.168324	0.107443	1	0.922453	0.739695	0.85528	0.406059	0.56958	0.804524	1	0.768358	0.453958
30	0.036297	0.165586	0.010827	0.03058	0.298638	0.010356	0.383289	0.15844		0.120377	0.712728	0.70657	0.345837	0.662099	0.31665	0.148316	0.589031	0.85431		0.687683
35	0.28463	0.052429	0.03478	0.094764	0.182008	0.026375	0.112047	0.073263		0.006158	0.760824	0.409407	0.330194	0.798236	0.087366	0.172796	0.532561	0.269372		0.493806
40	0.00358		0.023521	0.470144	0.133421		0.004922	0.00865		0.039904	0.441137		0.083834	0.553997	0.012666		0.010853	0.137453		0.227786
45	0.003253			0.063342						0.001831	0.346787			0.263021						0.070969
50	0.000555			0.166358							0.129288			0.493422
55	0.009848			0.373677							0.019197			0.232422

## Sheet: Figure 1N
Figure 1N
	EGFP-Rer1														Mnn9-mCherry
Time (s)	Cisterna 1	Cisterna 2	Cisterna 3	Cisterna 4	Cisterna 5	Cisterna 6	Cisterna 7	Cisterna 8	Cisterna 9	Cisterna 10	Cisterna 11	Cisterna 12	Cisterna 13	Cisterna 14	Cisterna 1	Cisterna 2	Cisterna 3	Cisterna 4	Cisterna 5	Cisterna 6	Cisterna 7	Cisterna 8	Cisterna 9	Cisterna 10	Cisterna 11	Cisterna 12	Cisterna 13	Cisterna 14
-45		0.023667		0.005761		0.073635					0.019698	0.280838				0.050558		0.080521		0.00925					0.020864	0.007961
-40		0.417053	0	0.444883	0.063012	0.108003	0.079144			0.025435	0.139886	0.332135		0.108189		0.000191	0.007681	0.066	0.000752	0.046816	0.033374			7.81e-05	0.104363	0.000903		0.003044
-35		0.498596	0.125025	0.389954	0.196134	0.222628	0.205199		0.11442	0.212668	0.582651	0.307678	0.094441	0.27576		0.054142	0.015635	0.031911	0.009891	0.03089	0.042334		0.004561	0.00838	0.07106	0.052588	0.055598	0.00092
-30		0.498701	0.382247	0.439339	0.387797	0.344568	0.336613	0.238656	0.137001	0.360536	0.440084	0.406802	0.262136	0.42256		0.022361	0.534958	0.053453	0.037796	0.033993	0.144745	0.032322	0	0.043134	0.055419	0.111669	0.000673	0.005332
-25		0.684099	0.592649	0.500599	0.656141	0.447988	0.595935	0.570248	0.292776	0.521278	0.541062	0.625105	0.39158	0.518314		0.089729	0.49085	0.080724	0.260773	0.1573	0.150489	0.157757	0.005326	0.013014	0.020872	0.194718	0.02401	0.068946
-20	0.364976	0.550215	0.652105	0.873928	0.513384	0.526373	0.613038	0.877803	0.725817	0.57743	0.796087	0.745831	0.922915	0.583289	0.023757	0.184391	0.431792	0.17545	0.170419	0.347664	0.352343	0.264847	0.02012	0.051362	0.326601	0.26068	0.071233	0.18192
-15	0.683482	0.937247	1	0.673355	1	0.530649	0.755695	0.957807	0.939383	0.798461	0.663364	0.72107	0.991316	0.638817	0.077307	0.302057	0.385085	0.180596	0.668921	0.344923	0.307117	0.317638	0.097909	0.041424	0.42808	0.204875	0.159906	0.087246
-10	0.767383	1	0.416128	1	0.908949	0.446907	0.94949	0.81053	0.987113	0.426776	0.573362	1	0.607076	0.742235	0.128851	0.361976	0.565551	0.536884	0.693077	0.457483	0.415893	0.62179	0.174808	0.331347	0.575438	0.460785	0.459753	0.334837
-5	1	0.94945	0.333965	0.635702	0.756808	0.507007	0.823587	0.95266	1	1	1	0.89419	0.93221	0.62415	0.521911	0.696663	0.761064	0.431276	0.781551	0.696554	0.569398	0.896372	0.369427	0.557506	0.957996	0.567858	0.67533	0.387519
0	0.846886	0.743279	0.605464	0.980398	0.84052	1	1	1	0.469883	0.794616	0.691553	0.780517	1	1	0.523912	0.818271	0.984075	0.708481	0.943566	1	1	1	0.318833	0.82947	0.963535	0.935214	1	0.88586
5	0.881784	0.713946	0.271256	0.906666	0.461641	0.615709	0.709356	0.536758	0.80212	0.736268	0.749681	0.632792	0.427171	0.814262	0.553123	0.906755	0.94134	0.696215	0.72677	0.834048	0.659553	0.968516	0.294814	1	1	0.554984	0.591307	1
10	0.451697	0.385885	0.195426	0.717984	0.546797	0.586245	0.693973	0.134657	0.881012	0.086483	0.340683	0.523372	0.24951	0.584794	1	0.801368	0.956032	1	0.856391	0.803047	0.870132	0.820868	1	0.560241	0.998797	1	0.823024	0.506945
15	0.017898	0.239764	0.107817	0.260952	0.390587	0.353748	0.28937	0.182233	0.585826	0.033823	0.231664	0.067079	0.075608	0.268458	0.658379	1	1	0.730023	0.910586	0.606928	0.765872	0.531581	0.608698	9.19e-05	0.73585	0.886312	0.374754	0.270406
20	0.078619	0.321716	0.019219	0.241145	0.218384	0.094995	0.115505	0.086365	0.264034		0.08024	0.024298	0.399726	0.053802	0.775485	0.821738	0.921003	0.799303	1	0.456289	0.605842	0.361405	0.532694		0.710534	0.335773	0.388986	0.100784
25	0.002924	0.211742	0.001422	0.030688	0.222916	0.128631	0.101275	0.037795	0.137921		0.067791	0.007516	0.000711	0.000436	0.561533	0.997906	0.951537	0.515295	0.989617	0.487139	0.437969	0.192449	0.570935		0.336565	0.452081	0.21252	0.030809
30	0.010061	0.208474	0.011291	0.031593	0.081114	0.037423	0.028275		0.082151			0.000671			0.554029	0.414682	0.68297	0.360896	0.791503	0.147041	0.264375		0.19346			0.157199
35	2.21e-05	0.318691	0.00088	0	0.120539		0.004477		0.003357						0.130913	0.176178	0.204619	0.347809	0.618895		0.139333		0.02107
40	0	0.15184		0.000546	0.006413		0.001065								0.073783	0.41934		0.335753	0.595844		0.022205
45		0.125557		0	0.004424											0.182052		0.084514	0.179536

## Sheet: Figure 1R
Figure 1R
	Erd2-GFP																		Mnn9-mCherry
Time (s)	Cisterna 1	Cisterna 2	Cisterna 3	Cisterna 4	Cisterna 5	Cisterna 6	Cisterna 7	Cisterna 8	Cisterna 9	Cisterna 10	Cisterna 11	Cisterna 12	Cisterna 13	Cisterna 14	Cisterna 15	Cisterna 16	Cisterna 17	Cisterna 18	Cisterna 1	Cisterna 2	Cisterna 3	Cisterna 4	Cisterna 5	Cisterna 6	Cisterna 7	Cisterna 8	Cisterna 9	Cisterna 10	Cisterna 11	Cisterna 12	Cisterna 13	Cisterna 14	Cisterna 15	Cisterna 16	Cisterna 17	Cisterna 18
-30	0.935867		0.63098	0.160793			0.05439			0.046614		0.155066			0.076571		0.070345		0.159418		0.000891	0.013659			0.176272			0.000653		0.037598			0.014763		0.567657
-25	0.129633		0.390506	0.769302			0.228473			0.84005		0.218891			0.527184		0.508358		0.313314		0.002433	0.002293			0.108624			0.009219		0.037224			0.431411		0.467107
-20	0.56601		0.533263	0.812754		0.184551	0.341533			0.110092	0.245749	0.33205	0.193991	0.214713	0.729569		0.82876		0.554953		0.047741	0.073514		0.022688	0.023744			0.006753	0.079518	0.0224	0.04337	0.00159	0.206981		0.390493
-15	0.944912	0.02514	0.915386	0.713998		0.189143	0.426043		0.25334	1	0.49005	0.505787	0.231741	1	1	0.2078	0.942141	0.739711	0.919986	0.022641	0.120571	0.055841		0.05909	0.432547		0.172658	0.03386	0.290917	0.008194	0.055946	0.042687	0.4463	0.004787	0.036151	0.120288
-10	1	0.273079	0.685169	0.815918	0.391895	0.776553	1	0.395878	0.403702	0.395337	0.486228	1	1	0.749989	0.651379	0.703575	1	1	0.65487	0.049936	0.317583	0.638132	0.009665	0.16444	0.203889	0.057273	0.046279	0.030851	0.330028	0.633685	0.555323	0.238816	0.430927	0.371545	0.404637	0.269533
-5	0.64244	0.451246	0.699028	1	1	1	0.879283	0.784991	1	0.099119	0.791977	0.679978	0.805903	0.351329	0.701883	1	0.974085	0.919614	0.572016	0.043206	0.084063	0.471457	0.021579	0.260537	0.729897	0.372847	0.444441	0.632939	0.39293	0.545293	0.333315	0.179424	0.491354	0.413897	0.505182	0.42963
0	0.650205	1	1	0.156459	0.346251	0.643904	0.472398	1	0.826651	0.021058	1	0.628134	0.175231	0.17986	0.276232	0.027946	0.746046	0.244968	0.740547	1	1	0.659778	0.579043	0.587582	0.151433	0.50053	0.759685	0.692436	0.498617	0.240795	0.658523	0.211409	0.569853	0.648487	0.863376	0.594777
5	0.734619	0.163174	0.211361	0.074999	0.64537	0.368917	0.394419	0.206414	0.615736	0.009184	0.207796	0.015194	0.030494	0.052508	0.026706	0.266658	0.114401	0.160999	0.957269	0.053176	0.590907	1	0.694756	1	0.492479	1	0.807289	0.642558	1	0.84016	0.979661	0.912534	0.629931	1	0.689773	0.891484
10	0.236354	0.545842	0.03985	0.100363	0.059296	0.096082	0.062742	0.072991	0.004858	0.010158	0.070404	0.038733	0.124975	0.111621	0.044731	0	0.198559	0.023847	0.909469	0.722353	0.472707	0.505754	1	0.898326	1	0.72907	1	1	0.728244	0.862373	1	0.850126	0.621239	0.481557	1	0.729315
15	0.199835	0.270755		0.016417	0.016969	0.040919	0.186031	0.12333	0.002267	0.099953	0.1243	0.018457	0.106557	0.417648	0.126037	0.007838	0.018074	0.005654	1	0.113121		0.706743	0.840153	0.643848	0.545054	0.309294	0.729362	0.759642	0.311665	1	0.760116	0.618015	1	0.81884	0.709193	1
20	0.140755	0.133272		0.015199	0.011668		0.028226	0.067938	0.144759	0.013621	0.081289	0.000164	0.003411	0.037344	0.316922	0.090733		0.011695	0.73295	0.369839		0.51176	0.029916		0.390594	0.479881	0.582844	0.788647	0.48238	0.574771	0.519273	1	0.746203	0.716172		0.582195
25	0.167621	0.00028					0.013573	0.001127	0.140685	0.015343	0.015954	0	0.221848	0.053958	0.004573	0.022094		0.072853	0.245403	0.012214					0.420879	0.004065	0.647197	0.779269	0.002639	0.51818	0.628785	0.833592	0.447069	0.520563		0.444085
30	0.043155						0.059862		0.003623	0.151593		0.001054	0.000752	0.008781	0.000568	0.024132		0.037763	0.500148						0.014774		0.667374	0.281857		0.155708	0.529523	0.238164	0.351345	0.36005		0.579534
35	0.00085								0.010711	0.357396			0.009391	0.046137				0.120589	0.294302								0.573591	0.44127			0.373989	0.243723				0.477999
40	0.014305								0.15058				0.006279	0.001778				0.063751	0.412553								0.458142				0.425448	0.001547				0.296699
45	0.01981												0.040769					0.105591	0.086535												0.255848					0.231659

## Sheet: Figure 1V
Figure 1V
	EGFP-Emp46																															iRFP-Rer1
Time (s)	Cisterna 1	Cisterna 2	Cisterna 3	Cisterna 4	Cisterna 5	Cisterna 6	Cisterna 7	Cisterna 8	Cisterna 9	Cisterna 10	Cisterna 11	Cisterna 12	Cisterna 13	Cisterna 14	Cisterna 15	Cisterna 16	Cisterna 17	Cisterna 18	Cisterna 19	Cisterna 20	Cisterna 21	Cisterna 22	Cisterna 23	Cisterna 24	Cisterna 25	Cisterna 26	Cisterna 27	Cisterna 28	Cisterna 29	Cisterna 30	Cisterna 31	Cisterna 1	Cisterna 2	Cisterna 3	Cisterna 4	Cisterna 5	Cisterna 6	Cisterna 7	Cisterna 8	Cisterna 9	Cisterna 10	Cisterna 11	Cisterna 12	Cisterna 13	Cisterna 14	Cisterna 15	Cisterna 16	Cisterna 17	Cisterna 18
-40	0.409788										0.342581											0.054611										0.552787										0.364052
-35	0.634131	0.001108	0.231482	0.182525							0.606778	0.075726	0.001012	0.036737								0.051025		0.218869								0.523295	0.131403	0.140508	0.050835							0.192946	0.145316	0.032016	0.135935
-30	0.261854	0.058518	0.712785	0.274509			0.058772	0.047542	0.193046		0.559156	0.120439	0.109521	0.110742	0.02363						0.116261	0.076893		0.400348				0.075123				0.256312	0.188972	0.230045	0.033372			0.086846	0.080224	0.080095		0.198161	0.006445	0.053906	0.241511	0.038732
-25	0.425872	0.24208	0.492476	0.402019		0.475231	0.32066	0.485967	0.336549	0.065853	0.953946	0.606053	0.671701	0.417186	0.015747		0.568241			0.277053	0.228524	0.290055		0.358145	0.071173	0.038476	0.180703	0.030655			0.007951	0.606126	0.041736	0.235792	0.002541		0.061029	0.348147	0.223586	0.454904	0.001534	0.718111	0.325313	0.146137	0.334806	0.031938		0.014672
-20	0.273936	0.260906	0.77624	0.381623		0.412215	0.532655	0.253542	0.79065	0.074566	0.69612	0.589243	0.672886	0.467687	0.337352		0.616679	0.002143	0.549757	0.351687	0.409404	0.400788		0.486203	0.104354	0.552948	0.121729	0.088291		0.101171	0.36433	0.653911	0.430923	0.37319	0.376669		0.028848	0.35081	0.175522	0.287845	0.000254	0.605321	0.265628	0.064059	0.399664	0.363713		0.482201	0.005577
-15	0.340013	0.408825	0.679643	0.433378	0.014819	0.702527	0.419777	0.550769	0.660895	0.617785	0.704861	0.838569	0.814233	0.699807	0.352661	0.603627	0.920781	0.693202	0.580023	0.718147	0.820676	0.641879	0.078716	0.427812	0.319883	0.808524	0.55768	0.142066	0.295414	0.207262	0.446792	0.603555	0.299828	0.210575	0.212505	0.017485	0.051274	0.520686	0.160534	0.310457	0.58533	0.747497	0.992722	0.16017	0.605297	0.605003	0.279565	0.687735	0.219053
-10	0.628298	1	0.985421	0.770544	0.248182	0.664057	0.542539	0.865643	0.963528	0.907625	0.750319	0.844285	0.918778	0.664775	0.590827	0.67722	0.992883	1	0.80893	0.653181	0.936927	0.643324	0.526425	0.743741	0.292591	0.400563	1	0.243724	0.232353	0.496824	0.72675	1	0.24597	0.435782	0.149603	0.210305	0.290629	0.78677	0.7218	0.773979	0.656162	0.564727	0.592619	0.401349	0.672656	0.438177	0.430349	0.972155	0.257117
-5	0.75619	0.662782	0.927528	0.840031	0.688208	0.808022	0.788004	0.776337	0.845708	0.908115	1	1	1	0.704505	0.946612	0.701353	1	0.894429	0.800937	1	0.829679	0.997097	0.861215	0.657483	0.422006	1	0.789199	0.838934	1	0.629104	0.774504	0.455717	0.534055	0.535456	1	0.649752	0.628147	0.977286	0.562375	1	0.627163	0.695449	0.9162	0.611844	1	0.719532	0.377629	0.707971	0.463442
0	0.971706	0.793987	1	0.802785	1	1	1	1	1	1	0.53616	0.63558	0.923345	1	1	1	0.942553	0.944809	1	0.993364	1	1	1	1	1	0.79514	0.696553	1	0.794789	1	1	0.973318	0.629285	1	0.905519	1	1	1	1	0.818397	0.934783	0.928008	0.787655	0.471079	0.935658	0.954301	1	0.540234	0.667975
5	0.725104	0.470929	0.338753	1	0.498373	0.839276	0.685619	0.773136	0.672394	0.876524	0.188712	0.728578	0.973905	0.516629	0.722242	0.851839	0.849548	0.965603	0.915064	0.998154	0.777443	0.828022	0.98095	0.284054	0.96307	0.40411	0.747833	0.506242	0.738881	0.927329	0.799871	0.845018	0.642001	0.635609	0.576211	0.554662	0.634689	0.868768	0.506898	0.827557	1	0.590123	1	0.786975	0.610529	1	0.563463	1	0.710573
10	1	0.508812	0.007673	0.707483	0.166329	0.421431	0.854328	0.135423	0.441071	0.691158	0.316535	0.788515	0.610363	0.3591	0.821935	0.78875	0.565214	0.955775	0.996773	0.906783	0.504296	0.710504	0.807907	0.06372	0.871782	0.10923	0.902817	0.653304	0.516569	0.831693	0.906497	0.971019	1	0.102339	0.837637	0.621428	0.29848	0.601737	0.254731	0.541904	0.306137	1	0.92316	1	0.564091	0.717726	0.194301	0.79757	1
15	0.679061	0.051273	0.000351	0.428453	0.022333	0.219982	0.748907	0.332419	0.267652	0.554504	0.000339	0.333531	0.242239	0.058007	0.767012	0.64133	0.275678	0.244052	0.72578	0.722918	0.166578	0.343121	0.756987		0.541288		0.108638	0.161032	0.010388	0.849225	0.506767	0.830556	0.665126	0.013864	0.015134	0.181134	0.153118	0.796378	0.85465	0.351933	0.362549	0.093425	0.136941	0.761857	0.192897	0.900503	0.35905	0.263625	0.430131
20	0.077622	0.003916		0.08278	0.000703	0.117189	0.484018	0.050877	0.004488	0.257111		0.034977	0.119411	0.09993	0.344734	0.57944	0.019395	0.21107	0.286104	0.792124	0.05203	0.288196	0.699045		0.495888		0.401088	0.113307		0.299606	0.359889	0.12615	0.242066		0.025722	0.107553	0.016104	0.778723	0.259496	0.099045	0.688355		0.200901	0.36155	0.177891	0.566436	0.473964	0.035781	0.337752
25	0.063996	0.005925			0.125329	0.001595	0.353127	0.06865		0.077303		0.036879	0.10774	0.080861	0.035127	0.424657		0.012638	0.304858	0.382027	1.87e-05	0.271697	0.682897		0.161514		0.141182	0.160203		0.062356	0.212576	0.017857	0.023773			0.164457	0.019704	0.60436	0.230052		0.053785		0.387037	0.111963	0.116742	0.096426	0.435456		0.087806
30	0.000459				0.009089		0.089478			0.003935		0.016548	0.002045			0.171431		0.00049		0.087699		0.005689	0.385099		0.033317		0.183319				0.000155	0.002159				0.064274		0.30864			0.25969		0.172884	0.078225			0.208165		0.072709
35							0.059912			0.00126			0.002436			0.075279		0.000135		0.018029		0.008286	0.208981				0.098256											0.160536			0.269605			0.004271			0.081388		0.001923
40										0.002414						0.006047						0.001717	0.042032																		0.07406						0.002055
45										0.005162												0.009172	0.003035																		0.001152
[truncated: 13 more columns]
