# Supplementary material for: Spatiotemporal dissection of the Golgi apparatus and the ER-Golgi intermediate compartment in budding yeast
Source: eLife. 2024 Mar 19;13:e92900. doi: 10.7554/eLife.92900 (PMC10950332; doi:10.7554/eLife.92900)
Supplement: Figure 2—source data 1. [file elife-92900-fig2-data1.xlsx]

## Sheet: Figure 2D
Figure 2D
	Grh1-2xEGFP														Mnn9-mCherry
Time (s)	Cisterna 1	Cisterna 2	Cisterna 3	Cisterna 4	Cisterna 5	Cisterna 6	Cisterna 7	Cisterna 8	Cisterna 9	Cisterna 10	Cisterna 11	Cisterna 12	Cisterna 13	Cisterna 14	Cisterna 1	Cisterna 2	Cisterna 3	Cisterna 4	Cisterna 5	Cisterna 6	Cisterna 7	Cisterna 8	Cisterna 9	Cisterna 10	Cisterna 11	Cisterna 12	Cisterna 13	Cisterna 14
-45					0.829326					0.633632		0.121715	0.806106						0.02802					0.125158		0.013318	0.097092
-40					0.509615					0.52931		0.37102	0.584096	0.105527					0.060231					0.125041		0.022151	0.045974	0.000124
-35					1			0.070544		0.763348		0.553684	0.762544	0.417457					0.020012			0.005329		0.190171		0.081967	0.170517	0.006127
-30	0.648863	0.362678	0.391806	0.271596	0.756176	0.261918	0.615336	0.602593		0.926057		0.48068	1	0.523054	0.103193	0.060832	0.03713	0.06127	0.014839	0.003014	0.030291	0.155355		0.233615		0.021942	0.284666	0.014957
-25	0.652	0.357139	0.646202	0.620743	0.917887	0.322178	0.612107	0.1657	0.722757	0.643281	0.174315	0.653421	0.852579	0.47403	0.175443	0.001132	0.026755	0.029619	0.241373	0.005053	0.031063	0.056705	0.239411	0.293493	0.01764	0.230124	0.165312	0.064235
-20	1	0.313596	1	0.698156	0.777722	1	1	0.284665	1	0.461124	1	0.858009	0.792713	0.676948	0.556092	0.078445	0.452911	0.04981	0.207086	0.19433	0.107043	0.117111	0.2202	0.235288	0.223576	0.347174	0.185175	0.164188
-15	0.987598	0.494828	0.620547	1	0.982805	0.572694	0.935624	0.679343	0.936592	1	0.855629	1	0.710353	0.821006	0.605201	0.134547	0.448424	0.409958	0.41965	0.228245	0.292017	0.296612	0.264531	0.293849	0.401743	0.35991	0.276451	0.359572
-10	0.630006	0.435287	0.875406	0.903355	0.50006	0.414779	0.372565	1	0.684639	0.636211	0.231803	0.507449	0.840434	1	0.584644	0.060485	0.479342	0.340238	0.392111	0.422175	0.178693	0.968751	0.362796	0.404484	0.27598	0.255662	0.422496	0.87079
-5	0.747018	0.824365	0.653631	0.89577	0.205173	0.070672	0.515329	0.368278	0.955632	0.120777	0.194494	0.746656	0.598032	0.056582	0.641907	0.468097	0.553415	0.574785	0.619877	0.484639	0.258549	0.791348	0.767931	0.459403	0.260196	0.712537	0.477156	0.761595
0	0.506483	1	0.256296	0.730093	0.043323	0.044925	0.260227	0.073355	0.712372	0.365654	0.038841	0.709207	0.650856	0.225995	0.904031	1	0.621629	0.316114	0.336977	0.42582	0.36919	0.691021	0.657794	0.538835	0.467937	0.461223	0.481652	0.675569
5	0.300765	0.488593	0.16169	0.264465	0	0.027181	0.079647	0.000339	0.32822	0.048685	0.170601	0.736988	0.67979	0.049334	0.720699	0.838895	0.535262	0.478989	0.472793	0.895224	0.414909	0.949321	0.659524	0.68516	0.549158	0.707581	0.507105	0.798392
10	0.29527	0.111178	0.1493	0.754893	0.088991	0.034596	0	0.00049	0.079996	0.034091	0.124381	0.610455	0.638865	0.003027	0.771937	0.650818	0.64939	0.669985	0.752402	0.980381	0.508156	1	0.733605	0.635149	0.731941	0.889671	0.534548	0.764342
15	0.143262	0.004131	0.018573	0.289227	0	0.019784	0.009232	0	0.011965	0.087471	0.177525	0.236758	0.420684	0.000953	0.997704	0.866733	0.657123	0.849606	0.684267	0.747044	0.714064	0.792115	0.725317	1	0.749899	1	0.695225	1
20	0.052734	0.041536	0.028184	0.004378	0.209023	0.126514	0.000473	3.67e-05	0.004701	0.307826	0.393157	0.056588	0.070935	0.002124	1	0.842063	1	1	0.735653	1	0.718282	0.539105	1	0.50735	0.794529	0.440223	0.743926	0.622001
25	0.123638	0.008874	0.000221	0.003251	0	0.001708	0.365098		0.003898	0.008221	0.324447	0.003018	0.186824	0.006063	0.610408	0.895704	0.47448	0.951533	0.888726	0.764281	1		0.572016	0.763201	1	0.659259	0.847593	0.523404
30	5.31e-05	7.19e-05	0.013274	2.93e-05	0.056467	0.011687	0.000514		8.63e-06	0.007657	0.186691	0.008795	0.179219	0.008252	0.293066	0.669704	0.444908	0.905492	0.679858	0.561661	0.799409		0.744417	0.685524	0.978522	0.842075	1	0.489342
35		0.0219	0.01174	0.000439	0.000211	0.033465	0		1.29e-05	0.047478	0.171899	0.004012	0.013092	0.009396		0.66248	0.439803	0.606549	1	0.30898	0.835141		0.573463	0.518667	0.951117	0.826508	0.947311	0.198369
40		0	0.010874	0	0		0.099489		0.010057	0.075684	0.188813	0.009063	0.266957	0.006558		0.635634	0.473672	0.1667	0.210823		0.764407		0.167591	0.310778	0.677525	0.627498	0.991068	0.319304
45		0.000213	0.005795		0		0.001354		0.000272		0.212886	0.188665	0.443409	0.032505		0.761849	0.402969		0.183609		0.449578		0.078052		0.861999	0.653231	0.440827	0.377915
50		0.01211	0.205844				0.000769				0.018377		0.055614			0.289616	0.186366				0.326324				0.733501		0.624366
55		0.000245	0.003429				2.47e-05				0.019915		0.25542			0.079097	0.159688				0.228241				0.608415		0.343961
60		0.002063	0.102355				0				0.14475		0.040417			0.033912	0.076636				0.254878				0.634818		0.119327
65			4.17e-06				0				0.004693		0.001539				0.056304				0.00516				0.277007		0.020205

## Sheet: Figure 2H
Figure 2H
Time (s)	EGFP-Rer1													Grh1-2xmCherry
	Cisterna 1	Cisterna 2	Cisterna 3	Cisterna 4	Cisterna 5	Cisterna 6	Cisterna 7	Cisterna 8	Cisterna 9	Cisterna 10	Cisterna 11	Cisterna 12	Cisterna 13	Cisterna 1	Cisterna 2	Cisterna 3	Cisterna 4	Cisterna 5	Cisterna 6	Cisterna 7	Cisterna 8	Cisterna 9	Cisterna 10	Cisterna 11	Cisterna 12	Cisterna 13
-50		0.037899	0.30459										0.043437		0.369926	0.418218										0.282202
-45		0.008515	0.328806						0		0.128839	0	0.011866		0.298605	0.422058						0.095683		0.218744	0.149478	0.573167
-40		0.118996	0.369035						0		0.061067	0.098914	0.0999		0.586358	0.2875						0.070851		0.344462	0.50493	0.673035
-35	0.064251	0.325175	0.408008	0.492016		0.021422			0		0.416664	0.409979	0.040537	0.518976	0.95252	0.379027	0.636456		0.239939			0.170272		0.769411	0.638912	0.562995
-30	0.019518	0.311272	0.385239	0.484079		0.021961	0.087952	0	0.025443		0.319852	0.426832	0.178775	0.548764	0.858091	0.295759	0.674192		0.29124	0.386913	0.086816	0.452945		0.799859	0.769537	0.73289
-25	0.06416	0.805538	0.463902	0.47719	0.088575	0.15791	0.010739	0	0		0.35755	0.335234	0.27581	0.430742	0.95779	0.400164	0.686621	0.231845	0.664894	0.447304	0.193276	0.628553		0.912824	0.716709	0.945416
-20	0.173286	0.691315	0.798623	0.658533	0.521105	0.281834	0.093169	0.182335	0.055158	0.432914	0.581405	0.22595	0.208835	0.550894	0.943982	1	0.903092	1	0.607436	0.524212	0.887953	1	0.945599	1	0.61561	1
-15	0.555331	0.932897	0.948181	0.738809	0.616777	0.269265	0.233024	0.309541	0.155609	0.244428	0.685658	0.651555	0.664194	0.701838	0.952793	0.898347	1	0.766859	0.536251	0.633925	1	0.534443	0.99757	0.952451	1	0.966446
-10	0.466143	0.82125	0.991967	0.809825	0.864592	0.557337	0.40243	0.176824	0.257669	0.431812	0.378142	0.610247	0.20771	0.86986	1	0.690706	0.964465	0.847536	0.714258	0.600884	0.4418	0.593125	1	0.748647	0.863544	0.662921
-5	0.646466	0.798871	0.967432	0.910114	0.895291	0.730166	0.663531	0.228032	0.070496	0.621003	0.518542	0.657657	0.543094	0.804077	0.987833	0.713403	0.890956	0.466638	0.834592	0.945908	0.72328	0.386876	0.900111	0.915988	0.932876	0.945853
0	1	0.76402	0.826782	0.971217	0.946506	0.830894	1	0.428592	0.469541	0.515372	0.731674	0.750128	0.407721	0.955637	0.765827	0.607186	0.866493	0.435527	1	0.993096	0.768961	0.576349	0.695169	0.79322	0.977426	0.325241
5	0.734234	0.80857	0.936828	0.847707	0.978611	1	0.807895	0.220252	0.640344	0.835026	0.510457	0.792156	0.549194	1	0.808017	0.653429	0.546767	0.416799	0.787246	1	0.621924	0.707512	0.765864	0.669997	0.886767	0.611692
10	0.498503	1	0.977968	0.875427	0.877706	0.640904	0.797982	0.543722	0.250516	1	0.704686	0.858385	0.397349	0.601717	0.628044	0.813404	0.57758	0.405712	0.681606	0.933931	0.467458	0.49445	0.796575	0.646041	0.560578	0.829483
15	0.541198	0.962191	0.823524	0.901347	0.650725	0.875288	0.770154	0.430638	0.48459	0.955567	0.888218	1	0.26085	0.648244	0.916147	0.643748	0.185065	0.138744	0.523257	0.837514	0.368006	0.258181	0.66285	0.561698	0.688785	0.11539
20	0.62483	0.983978	0.88688	1	1	0.684256	0.836174	1	1	0.881394	1	0.791529	1	0.720902	0.723031	0.354183	0.311017	0.486232	0.522002	0.80106	0.650844	0.502774	0.444419	0.45248	0.454568	0.304619
25	0.394389	0.932942	1	0.713924	0.381489	0.759159	0.871324	0.530705	0.518002	0.72865	0.89113	0.732509	0.395732	0.684892	0.46973	0.614394	0.190629	0.067776	0.484769	0.856614	0.668667	0.205406	0.248363	0.561388	0.463126	0.115812
30	0.709472	0.693287	0.88415	0.6997	0.583342	0.838749	0.960478	0.867709		0.672166	0.811738	0.839565	0.296412	0.593683	0.315014	0.323342	0.070097	0.05265	0.451246	0.91356	0.74333		0.31809	0.479212	0.237924	0.088195
35	0.512823	0.885417	0.99678	0.643917	0.490821	0.830614	0.808364	0.768999		0.381807	0.680009	0.199401	0.531299	0.437181	0.634693	0.052804	0.10753	0.06315	0.281522	0.630644	0.528327		0.203265	0.345402	0.123776	0.077902
40	0.660371	0.848492	0.770467	0.689205	0.720964		0.912715	0.762354		0.457171	0.959202	0.591034		0.743374	0.242973	0.073845	0.050182	0.178486		0.534958	0.377131		0.205488	0.428506	0.034372
45	0.574222	0.745732	0.823781	0.475276	0.603685		0.072318	0.660656		0.199728	0.831881	0.346771		0.713466	0.02191	0.150772	0.069993	0.193823		0.029636	0.178565		0.108342	0.351098	0.004431
50	0.656007	0.528012	0.787148	0.35164	0.595182			0.693893		0.188713	0.911058	0.183736		0.749906	0.022218	0.029354	0.062254	0.227506			0.1288		0.153202	0.433565	0.01798
55	0.734512	0.406514	0.404656	0.304388	0.660209			0.810837			0.797444	0.224203		0.44282	0.035368	0.042508	0.018525	0.046414			0.033459			0.314685	0.010752
60	0.613313	0.413175	0.460442	0.351582	0.270609			0.413366			0.678132	0.059534		0.180089	0.079966	0.0201	0.068161	0.028143			0.006394			0.247924	0.029848
65	0.680495	0.269213	0.358805	0.313578	0.31282			0.486557			0.562718			0.213615	0.046494	0.014934	0.021313	0.050187			0.045115			0.17902
70		0.236701	0.130757	0.269338				0.437972			0.644385				0.008283	0.00534	0.008919				0.010077			0.229246
75		0.005788	0.019977	0.236895				0.099844			0.711302				0.007863	0.034488	0.018399				0.007594			0.263779
80				0.166361				0.237636			0.702764						0.005441				0.011325			0.195847
85				0.069395				0.030067			0.497776						0.014785				0.000628			0.026082

## Sheet: Figure 2L
Figure 2L
	GFP-Ypt1																		Grh1-2xmCherry
Time (s)	Cisterna 1	Cisterna 2	Cisterna 3	Cisterna 4	Cisterna 5	Cisterna 6	Cisterna 7	Cisterna 8	Cisterna 9	Cisterna 10	Cisterna 11	Cisterna 12	Cisterna 13	Cisterna 14	Cisterna 15	Cisterna 16	Cisterna 17	Cisterna 18	Cisterna 1	Cisterna 2	Cisterna 3	Cisterna 4	Cisterna 5	Cisterna 6	Cisterna 7	Cisterna 8	Cisterna 9	Cisterna 10	Cisterna 11	Cisterna 12	Cisterna 13	Cisterna 14	Cisterna 15	Cisterna 16	Cisterna 17	Cisterna 18
-45			0.001809	0.004366		0		0.00464													0.294254	0.106426		0.385674		0.740891
-40			0.007237	0.002699		0.016146		0.057782					0.033707	0.008525				0.018138			0.714816	0.205826		0.637832		0.736273					0.187394	0.513456				0.534304
-35			0.008464	0.000149		0.006881		0.009231					0.025242	0.350243				0.080552			0.594992	0.47234		0.435281		0.787153					0.350975	0.715089				0.613556
-30	0.018263		0.272826	0.037657		0.052589		0		0.199827		0.044358	0.066433	0.12521				0.145291	0.371718		0.500586	0.488423		0.791385		0.593898		0.395831		0.094984	0.773514	0.553885				0.722067
-25	0.530943	0.048539	0.17871	0.022392	0.009327	0.073796		0.093334	0.152852	0.305848		0.123835	0.475583	0.166943		0.130779	0.421283	0.14937	0.623566	0.20988	0.904906	0.499254	0.215524	0.68784		0.740547	0.529793	0.485212		0.636556	1	0.501151		0.186587	0.615336	0.702314
-20	0.335536	0.201945	0.123287	0.043423	0.038674	0.006499	0.003018	0.091263	0.226783	0.452055	0.141835	0.159368	0.410167	0.12305	0.596329	0.097114	0.118442	0.189073	0.410149	0.515855	0.656324	0.642422	0.779011	0.720418	0.295307	0.307443	0.462332	0.591214	0.494967	0.411397	0.901947	0.946209	0.218518	0.792715	0.724336	0.747624
-15	0.266326	0.079547	0.457384	0.247893	0.083707	0.066278	0.176268	0.727134	0.387195	0.57075	0.042233	0.201893	0.069607	0.171462	0.782596	0.215712	0.491298	0.230185	0.883826	1	1	0.480811	0.813057	1	0.27926	0.718853	0.640946	0.667122	0.758436	0.63389	0.674035	0.908434	0.405932	1	1	0.417233
-10	0.185607	0.368621	0.547549	0.327549	0.117342	0.052389	1	0.755776	0.615823	0.714147	0.867596	0.21753	0.272093	0.180302	0.970622	0.432719	0.389437	0.336109	1	0.648804	0.604503	1	1	0.588206	0.849274	0.818296	1	1	0.982866	0.736927	0.851596	0.987595	0.474523	0.8803	0.706611	0.8627
-5	0.484101	0.513805	0.577595	0.81282	0.307753	0.018895	0.555302	0.407515	0.890591	0.363612	1	0.711261	0.289214	0.353913	1	0.324164	0.146667	0.676445	0.672823	0.551756	0.591569	0.949843	0.598882	0.629105	0.613564	0.585978	0.944855	0.716837	0.863275	1	0.712686	1	0.811119	0.887963	0.890902	1
0	0.296627	0.635528	0.401649	0.715827	0.734974	0.222882	0.944351	1	0.966195	0.976597	0.832401	0.858351	0.590045	0.659844	0.458867	0.396514	0.361394	0.752161	0.46962	0.964904	0.583638	0.861717	0.498065	0.684133	0.765723	1	0.721424	0.546697	0.677505	0.756393	0.602265	0.679922	0.47512	0.819486	0.502468	0.67722
5	0.908143	0.588321	0.513708	0.700703	0.850009	0.145026	0.902703	0.250212	0.869315	0.876205	0.844835	0.648675	0.31408	0.443136	0.526727	0.57169	0.382253	0.719765	0.655455	0.607351	0.23962	0.742347	0.501721	0.719239	0.785207	0.771151	0.923409	0.465013	1	0.570058	0.787623	0.806825	1	0.839515	0.772148	0.419939
10	1	0.635302	0.694106	0.681284	1	0.832948	0.613644	0.684098	0.99893	1	0.728316	1	0.804235	1	0.319032	0.576034	0.397572	1	0.353271	0.883688	0.607821	0.999437	0.544775	0.871631	0.634407	0.242045	0.76902	0.655234	0.73355	0.601349	0.67954	0.90862	0.719612	0.887309	0.631828	0.364209
15	0.63211	1	0.942625	1	0.729627	0.435915	0.533135	0.214835	1	0.602147	0.584391	0.389662	0.616419	0.62456	0.191719	0.824328	0.61506	0.723162	0.149682	0.904792	0.650545	0.940635	0.496413	0.650658	1	0.360396	0.570726	0.779459	0.303708	0.267796	0.934065	0.779843	0.555877	0.606139	0.289413	0.688213
20		0.960565	1	0.828476	0.1	1	0.867316	0.02193	0.859494	0.341558	0.605229	0.775444	0.950422	0.796399	0.074868	1	1	0.764936		0.60805	0.488208	0.913077	0.004162	0.63284	0.653192	0.117118	0.756521	0.306103	0.391918	0.061609	0.769596	0.871737	0.285327	0.787349	0.094663	0.454728
25			0.86789	0.678163		0.795085	0.752697	0.016092	0.622866	0.421571	0.095509	0.201869	1		0.005061	0.634463	0.193503	0.818056			0.54733	0.497461		0.665893	0.52661	0.179954	0.325768	0.149478	0.088175	0.038423	0.604265		0.074475	0.657134	0.068123	0.090588
30			0.608501	0.370119		0.709839	0.625334	0.043536	0.48518				0.926475			0.724055		0.355361			0.27869	0.06592		0.701911	0.530079	0.091705	0.303573				0.413377			0.620871		0.04317
35			0.060031	0.258479		0.595595		0.217579	0.47275				0.367101			0.791333		0.364173			0.01088	0.07896		0.845178		0.044277	0.017502				0.457275			0.383631		0.00576
40			0.215587			0.138618			0.211296				0.29095			0.821402					0.046161			0.652675			0.001838				0.40823			0.525121
45						0.320925			0.142066				0.278964			0.710268								0.480205			0.006717				0.481663			0.627275
50						0			0.15169				0.095172			0.552341								0.144986			0.041484				0.285804			0.391222
55						0.239374			0.052324							0.535015								0.017775			0.015882							0.17265
