# Supplementary material for: Spatiotemporal dissection of the Golgi apparatus and the ER-Golgi intermediate compartment in budding yeast
Source: eLife. 2024 Mar 19;13:e92900. doi: 10.7554/eLife.92900 (PMC10950332; doi:10.7554/eLife.92900)
Supplement: Figure 3—source data 1. [file elife-92900-fig3-data1.xlsx]

## Sheet: Figure 3D
Figure 3D
	EGFP-Sed5													Mnn9-mCherry
Time (s)	Cisterna 1	Cisterna 2	Cisterna 3	Cisterna 4	Cisterna 5	Cisterna 6	Cisterna 7	Cisterna 8	Cisterna 9	Cisterna 10	Cisterna 11	Cisterna 12	Cisterna 13	Cisterna 1	Cisterna 2	Cisterna 3	Cisterna 4	Cisterna 5	Cisterna 6	Cisterna 7	Cisterna 8	Cisterna 9	Cisterna 10	Cisterna 11	Cisterna 12	Cisterna 13
-65	0.24254	0.014061							0.370609					0.047809	0.029833							0.223804
-60	0.4696	0.124761							0.378743					0.090682	0.04963							0.602394
-55	0.336214	0.239073		0.172922				0.144927	0.391518					0.151641	0.084703		0.037008				0.117085	0.394095
-50	0.721849	0.462402		0.317506				0.133183	0.44272					0.352428	0.047565		0.034604				0.036472	0.785617
-45	0.429925	0.355549		0.588507	0.109808			0.341633	0.62514					0.508931	0.112255		0.141897	0.122789			0.097983	0.63126
-40	0.820828	0.509388		0.581913	0.241448			0.416184	0.495923	0.38854				0.52212	0.180456		0.114336	0.067487			0.172142	0.777818	0.027612
-35	0.561889	0.338053		0.549695	0.187626	0.332451	0.116369	0.382376	0.609457	0.359936				0.499207	0.334546		0.208354	0.066881	0.058303	0.22639	0.131947	0.941875	0.027617
-30	0.792455	0.375936		0.490787	0.438813	0.172628	0.237477	0.613445	0.446716	0.947724			0.056584	0.671741	0.362135		0.317935	0.189503	0.081971	0.10305	0.288804	0.623096	0.135375			0.021135
-25	0.714533	0.657172	0.104978	0.42153	0.732882	0.252116	0.522342	0.955551	0.729682	0.352605		0.149787	0.306479	0.787455	0.461124	0.074505	0.434801	0.231196	0.081559	0.081375	0.505302	0.723804	0.231631		0.016504	0.08422
-20	0.837816	0.63085	0.322727	0.627165	0.749097	0.537254	0.576605	0.914368	0.481939	0.81435	0.087884	0.130107	0.127254	0.960737	0.758196	0.632177	0.457486	0.275026	0.083656	0.1395	0.490559	0.452971	0.391474	0.131684	0.045981	0.052669
-15	0.682339	0.588193	0.512872	0.672127	0.725098	0.771536	0.912799	0.761509	0.457465	0.719453	0.102639	0.658932	0.28995	0.885074	0.66396	0.72567	0.910637	0.653566	0.246791	0.281938	0.569578	0.504898	0.656231	0.204516	0.155068	0.025695
-10	0.707577	0.824575	0.564891	0.58426	0.832947	0.82453	0.782699	0.85983	0.714298	0.596899	0.086565	0.732792	0.672777	1	0.874923	0.570908	1	0.803187	0.173592	0.324313	0.846222	0.515241	0.852245	0.307202	0.306994	0.315794
-5	0.611352	0.786936	0.939686	0.604936	0.79569	1	1	0.753788	0.72852	1	0.50789	0.478571	1	0.646286	0.747817	0.907795	0.896704	0.830112	0.469205	0.708693	0.891744	0.724681	0.967756	0.562231	0.379008	0.321675
0	0.736821	1	0.723447	0.710503	1	0.913437	0.232024	1	0.916597	0.472984	1	1	0.884161	0.777188	0.976972	1	0.869206	0.926168	0.632215	0.647763	1	1	0.961153	1	1	0.439767
5	0.891482	0.893131	1	0.846533	0.853485	0.727479	0.406705	0.793909	1	0.207063	0.967016	0.296856	0.743696	0.707728	1	0.681469	0.843258	1	0.839299	0.865441	0.902987	0.971411	1	0.897628	0.917696	0.62537
10	1	0.786259	0.909767	1	0.362208	0.939676	0.616502	0.695324	0.57349	0.456663	0.847887	0.750929	0.841459	0.242184	0.909656	0.649865	0.973757	0.362274	1	1	0.80518	0.739677	0.551276	0.810254	0.790697	1
15	0.999979	0.641219	0.625603	0.41929	0.107995	0.558147	0.854215	0.644651	0.457797	0.052545	0.401253	0.389106	0.630875	0.482762	0.8082	0.521514	0.326494	0.678274	0.995742	0.935713	0.843968	0.87387	0.650072	0.71447	0.891286	0.820522
20	0.965796	0.812813	0.86302	0.527155	0.240378	0.347797	0.608139	0.543962		0.610503	0.374918	0.527289	0.655917	0.048498	0.932676	0.642953	0.442226	0.518573	0.553337	0.970213	0.761098		0.645563	0.165945	0.582882	0.914897
25	0.93175	0.853949	0.638415	0.401309	0.132768	0.538279	0.487516			0.37338	0.452023	0.316586	0.976056	0.088209	0.835027	0.62364	0.219616	0.530464	0.686238	0.481669			0.41562	0.321053	0.359945	0.210801
30	0.728667	0.432052	0.681059		0.244655	0.614831	0.12187				0.21018	0.218161	0.430654	0.139075	0.749142	0.609737		0.655264	0.220308	0.388442				0.108558	0.287226	0.35214
35	0.841822	0.374401	0.627433		0.262098	0.670204	0.107443					0.285825	0.611032	0.391646	0.501141	0.354262		0.835751	0.275341	0.074501					0.092718	0.519132
40	0.775509	0.47779	0.693799			0.404713	0.284424						0.556861	0.109002	0.365109	0.149793			0.089139	0.056085						0.074477
45	0.714167	0.498034	0.220374			0.392002	0.309507						0.83334	0.466631	0.315598	0.179291			0.112235	0.008487						0.142458
50	0.482959	0.294942	0.319681			0.338871							0.649084	0.329745	0.340496	0.071239			0.041743							0.195548
55		0.195516	0.297485			0.154976							0.447963		0.121861	0.024143			0.08405							0.117689

## Sheet: Figure 3H
Figure 3H
	Vrg4-GFP																		Mnn9-mCherry
Time (s)	Cisterna 1	Cisterna 2	Cisterna 3	Cisterna 4	Cisterna 5	Cisterna 6	Cisterna 7	Cisterna 8	Cisterna 9	Cisterna 10	Cisterna 11	Cisterna 12	Cisterna 13	Cisterna 14	Cisterna 15	Cisterna 16	Cisterna 17	Cisterna 18	Cisterna 1	Cisterna 2	Cisterna 3	Cisterna 4	Cisterna 5	Cisterna 6	Cisterna 7	Cisterna 8	Cisterna 9	Cisterna 10	Cisterna 11	Cisterna 12	Cisterna 13	Cisterna 14	Cisterna 15	Cisterna 16	Cisterna 17	Cisterna 18
-50	0.121743									0.000235			0.164106	0.154831					0.055708									0.091012			0.251153	0.136811
-45	0.106716									0.002198			0.438925	0.052834					0.169524									0.128278			0.551563	0.44573
-40	0.22862					0.036946	0.008482			0.007374			0.430765	0.428753					0.228955					0.130858	0.154095			0.258658			0.433946	0.824705
-35	0.441545		0.054628		0.12644	0.244994	0.078319		0.130542	0.032988	0.010719		0.49161	0.429136					0.693302		0.096965		0.391201	0.184241	0.457032		0.187106	0.213907	0.241878		0.610502	0.884209
-30	0.408875		0.191826	0.278394	0.437247	0.200528	0.154714		0.264345	0.099745	0.061538		0.638956	0.538465	0.039269			0.032353	0.513357		0.099437	0.633232	0.808558	0.332935	0.442691		0.370557	0.268324	0.509122		0.427626	0.988296	0.021179			0.338262
-25	0.459485		0.185021	0.396862	0.451957	0.175429	0.172075	0.188895	0.326275	0.331837	0.092801	0.298233	0.602989	0.54989	0.023975	0.21703		0.100988	0.561301		0.220199	0.981136	0.700244	0.215358	0.371396	0.337532	0.540179	0.65448	0.501918	0.312818	0.598504	0.845376	0.153932	0.258759		0.158255
-20	0.694832		0.206801	0.584396	0.390836	0.15502	0.242201	0.417156	0.677961	0.372041	0.204076	0.685146	0.711907	0.585946	0.082678	0.365186	0.211837	0.217643	0.543563		0.217604	0.683931	0.916731	0.584986	0.42173	0.684873	0.863373	0.477541	0.69383	0.448672	0.791804	0.700908	0.36084	0.313748	0.331101	0.457649
-15	0.632931		0.565262	0.659495	0.640443	0.489989	0.489213	0.54331	0.774595	0.700468	0.155123	0.400611	0.785078	0.758654	0.082205	0.554558	0.399666	0.423539	0.596568		0.580069	0.844052	0.926143	1	0.496471	0.8192	1	0.808795	0.600134	0.531178	0.767476	0.7341	0.315249	0.812258	0.56923	0.746605
-10	0.632634	0.118314	0.592287	0.859484	0.903638	0.686037	0.481163	0.700763	0.748621	0.669141	0.609951	0.784271	0.803177	0.876296	0.183745	0.609559	0.499823	0.610732	0.734676	0.221521	0.819677	1	0.944221	0.995991	0.620396	1	0.794469	1	1	0.638162	0.507046	0.856148	0.453259	1	0.715426	0.769327
-5	0.646074	0.446586	0.736382	0.835429	0.862079	0.578923	0.701039	0.698996	0.817406	0.693878	0.49752	0.61472	0.831671	0.981431	0.435939	0.831741	0.634047	0.658601	0.581503	0.837687	0.933811	0.668194	1	0.569492	0.611601	0.811008	0.884695	0.882733	0.72238	0.388094	0.554999	0.608101	1	0.471327	0.78821	1
0	1	0.855012	0.870087	0.673792	0.74121	0.768416	0.697624	0.75521	0.858485	0.52139	0.7345	1	1	1	0.615194	0.920763	1	0.765802	1	1	1	0.438478	0.542305	0.869908	1	0.705229	0.936984	0.47238	0.725027	0.866075	1	1	0.777619	0.859046	1	0.74592
5	0.664778	1	1	0.771929	1	0.705957	1	0.882989	0.908331	0.754912	0.58157	0.67566	0.906192	0.925696	0.896197	0.889456	0.863749	1	0.833439	0.802264	0.898152	0.816777	0.288248	0.95107	0.88364	0.437519	0.916894	0.425437	0.474831	1	0.678611	0.540607	0.755293	0.73866	0.044012	0.999484
10	0.813123	0.738874	0.974544	1	0.778832	0.80331	0.850734	1	0.890129	0.872819	1	0.576007	0.833304	0.831611	1	1	0.726416	0.980779	0.8076	0.934011	0.545477	0.596887	0.23029	0.519961	0.859406	0.551567	0.720947	0.326818	0.71499	0.956351	0.464711	0.439202	0.759432	0.697175	0.031256	0.784282
15	0.706708	0.952814	0.549379	0.451367	0.652343	0.939979	0.889039	0.746875	1	1	0.837787	0.526103	0.72126	0.652274	0.933023	0.925762	0.467017	0.811917	0.65898	0.894176	0.260655	0.202031	0.172717	0.490742	0.692442	0.553962	0.805946	0.352011	0.482125	0.97505	0.259957	0.293637	0.539096	0.583961	0.035638	0.530221
20	0.728389	0.666749	0.575768		0.632564	1	0.804132	0.630788	0.849648	0.835314	0.420084	0.512617	0.597053	0.674944	0.974914	0.689313	0.086307	0.827171	0.787188	0.416854	0.467772		0.132118	0.362325	0.323873	0.330907	0.642407	0.285381	0.036987	0.956684	0.250837	0.566939	0.355294	0.196208	0.009825	0.411894
25	0.813713	0.673566	0.669662		0.335433	0.641695	0.591812	0.620343	0.752794	0.594558	0.442411	0.69164	0.536936	0.675772	0.864971	0.509254		0.630685	0.828939	0.451293	0.458678		0.074326	0.356505	0.409476	0.164276	0.170748	0.112236	0.038153	0.923506	0.560993	0.422775	0.416122	0.098274		0.165132
30	0.665395	0.54523	0.748168			0.362824	0.468382	0.395984	0.419789	0.655244	0.274643		0.478242	0.531411	0.838131	0.380852		0.547784	0.493903	0.211083	0.510003			0.394859	0.385387	0.101804	0.148754	0.140331	0.065362		0.498193	0.495687	0.197348	0.154832		0.289988
35	0.5863	0.478576	0.573398			0.379504	0.215877		0.403374	0.650425	0.150535				0.698541	0.190263		0.316207	0.646918	0.198314	0.879158			0.254593	0.049562		0.048651	0.099545	0.00205				0.092921	0.002125		0.144886
40	0.687886	0.304939				0.33838	0.056546		0.081966	0.180655	0.045794				0.749745			0.176117	0.440943	0.094289				0.358853	0.039126		0.025159	0.039371	0.032234				0.228028			0.013533
45	0.611118	0.346576				0.355377	0		0.004821						0.56365				0.686958	0.062116				0.571204	0.016038		0.048662						0.008218
50	0.440466	0.26099				0.269496									0.564787				0.11457	0.120319				0.551536									0.407987
55	0.511947	0.111574													0.117838				0.426557	0.003105													0.007479

## Sheet: Figure 3L
Figure 3L
	Sec21-2xEGFP																	Mnn9-mCherry
Time (s)	Cisterna 1	Cisterna 2	Cisterna 3	Cisterna 4	Cisterna 5	Cisterna 6	Cisterna 7	Cisterna 8	Cisterna 9	Cisterna 10	Cisterna 11	Cisterna 12	Cisterna 13	Cisterna 14	Cisterna 15	Cisterna 16	Cisterna 17	Cisterna 1	Cisterna 2	Cisterna 3	Cisterna 4	Cisterna 5	Cisterna 6	Cisterna 7	Cisterna 8	Cisterna 9	Cisterna 10	Cisterna 11	Cisterna 12	Cisterna 13	Cisterna 14	Cisterna 15	Cisterna 16	Cisterna 17
-85		0.540717		0.148993	0.063203														0.311832		0.046512	0.442779
-80		0.361067		0.185616	0.177193														0.179669		0.123696	0.328982
-75		0.554408		0.410479	0.047803									0.635509					0.510288		0.272458	0.392256									0.710318
-70		0.433465		0.383964	0.326037	0.010941								0.366937					0.446661		0.276965	0.472204	0.698174								0.545404
-65		0.316363		0.292842	0.084554	0.001266						0.146727		0.309745					0.494283		0.292012	0.463295	0.312541						0.57385		0.624375
-60		0.380681	0.343855	0.314202	0.269923	0.099681						0.07773		0.340952	0.286101				0.533067	0.362393	0.420086	0.721226	0.914457						0.357206		0.693696	0.370865
-55		0.67546	0.250276	0.093777	0.014224	0.193966						0.203403		0.397408	0.152535				0.523165	0.255971	0.497186	0.621812	0.824067						0.622846		0.818841	0.418285
-50		0.494396	0.252079	0.498885	0.173675	0.062731						0.384241	0.065068	0.320996	0.096715				0.621834	0.461292	0.736205	1	0.750933						0.987371	0.070146	0.886182	0.462045
-45		0.487218	0.554177	0.281104	0.357268	0.047464						0.319266	0.362134	0.36158	0.142984		0.057562		0.684864	0.835394	0.72319	0.77956	0.535006						0.638569	0.357617	0.747606	0.477758		0.385935
-40		0.326797	0.451228	0.327941	0.224621	0.051525				0.484558		0.24403	0.220872	0.473639	0.396576		0.241243		1	0.982148	0.913859	0.690284	0.922367				0.389314		0.72007	0.258211	0.842863	0.731602		0.594715
-35	0.256397	0.325056	0.569407	0.226495	0.771963	0.007388	0.172471			0.434236		0.176356	0.786273	0.474802	0.516189		0.137072	0.561253	0.696852	1	0.718678	0.618338	0.628193	0.301207			0.376198		0.67255	0.482075	0.866643	0.742815		0.954064
-30	0.194453	0.458851	0.454895	0.297937	0.581144	0.361204	0.270406		0.549197	0.468338		0.283684	0.700251	0.394814	0.527481		0.548354	0.830896	0.734564	0.980708	0.89603	0.868546	0.719978	0.893435		0.792633	0.475807		0.779266	0.624595	0.849785	0.987623		0.970154
-25	0.523024	0.329443	0.48376	0.188141	0.194959	0.310913	0.217892		0.375614	0.579746	0.060882	0.303242	0.390413	0.518479	0.480659	0.096545	0.515959	0.818223	0.573198	0.831227	0.695855	0.845939	0.66185	0.805747		0.745906	0.604822	0.211348	0.661306	0.558475	1	0.525655	0.215148	1
-20	0.375286	0.552527	0.611299	0.398159	0.370181	0.244965	0.138781		0.632983	1	0.172258	0.446974	0.733648	0.468071	0.470414	0.070733	0.245252	1	0.991228	0.844207	1	0.703298	1	1		1	0.860768	0.042546	0.653227	0.61138	0.86334	0.779734	1	0.898947
-15	0.30041	0.61176	0.501796	0.406785	0.171174	0.367184	0.248468	0.38478	0.536957	0.490969	0.286274	0.854929	0.544949	0.559999	0.545189	0.40501	0.378615	0.994161	0.799976	0.70784	0.96712	0.49338	0.722982	0.779168	0.44004	0.86375	0.965804	0.288104	1	0.70291	0.796633	0.674634	0.827652	0.866152
-10	0.331481	0.586336	0.540841	0.346317	0.198996	0.33916	0.130634	0.484967	0.559433	0.316622	0.767334	0.594511	0.627724	0.493421	0.731466	0.105515	0.653893	0.537299	0.935827	0.631178	0.629516	0.456443	0.748205	0.700698	0.726184	0.720025	0.511096	1	0.720294	0.690608	0.718207	0.862064	0.484858	0.988184
-5	0.324551	0.462725	0.885454	0.44443	0.257102	0.354559	0.366017	0.144992	0.647816	0.161115	0.730046	0.805867	0.642242	0.436655	0.805096	0.13848	0.643125	0.560609	0.640387	0.756489	0.737422	0.460315	0.555388	0.628255	0.607412	0.619017	0.692011	0.629117	0.694663	1	0.555419	0.851949	0.442594	0.938101
0	0.592555	0.595394	0.550659	0.438728	0.270361	0.25588	0.398651	0.951568	0.711421	0.665014	0.669731	0.547243	0.626205	0.693733	1	0.318312	0.786099	0.517022	0.476593	0.47116	0.626876	0.555688	0.406184	0.954036	1	0.685836	0.91739	0.390205	0.671054	0.638031	0.808622	1	0.406093	0.475917
5	0.534409	0.500121	0.686194	0.53497	0.318814	0.511218	0.361291	1	0.747566	0.762622	0.920528	0.782429	0.496523	0.635892	0.756404	0.396396	0.66472	0.252882	0.330211	0.403807	0.673165	0.429677	0.182662	0.858046	0.994346	0.510238	0.967177	0.16061	0.636956	0.470423	0.592101	0.7591	0.700274	0.384578
10	0.955397	0.507197	0.806136	0.865935	0.870398	0.405722	0.435707	0.738629	0.675266	0.757655	1	0.964474	1	0.751289	0.726398	0.828612	0.730337	0.265858	0.224159	0.20027	0.830669	0.451021	0.339882	0.555812	0.81758	0.394377	0.72644	0.172293	0.600193	0.499329	0.693732	0.525558	0.628493	0.216428
15	0.984488	0.626886	0.973461	0.71398	0.899439	0.276742	0.612949	0.567119	0.889581	0.900986	0.801536	0.759246	0.412808	0.746687	0.591908	0.747444	0.934953	0.343288	0.453352	0.448676	0.898645	0.299587	0.201431	0.367545	0.722014	0.525031	0.772646	0.097416	0.531149	0.006458	0.554679	0.328736	0.300807	0.467391
20	1	0.911197	0.623713	0.486632	0.874841	0.975604	1	0.998817	1	0.58743	0.898067	1	0.673444	0.905851	0.8202	0.702586	0.955586	0.1984	0.436863	0.059034	0.317958	0.31221	0.513286	0.764113	0.86611	0.140133	0.700496	0.039729	0.35364	0.016278	0.553418	0.384754	0.351859	0.444645
25	0.60165	0.672661	0.708194	1	0.953935	1	0.693291	0.38631	0.665904	0.942791	0.248749	0.863224	0.662825	0.964143	0.715772	1	0.897583	0.187144	0.094786	0.091555	0.536857	0.224334	0.832	0.162227	0.468822	0.02991	1	0.036693	0.405946	0.070655	0.381885	0.294589	0.216691	0.322673
30	0.447751	0.902229	0.712281	0.733562	0.813514	0.508468	0.786459	0.157504	0.958577	0.481116	0.064365	0.933942		1	0.5883	0.742076	1	0.042467	0.215916	0.07756	0.240388	0.141201	0.676653	0.150105	0.24776	0.20471	0.329517	0.001945	0.324004		0.282027	0.124629	0.149822	0.132528
35	0.773893	0.842873	1	0.683261	0.662063	0.228648	0.896877	0.102401	0.835736	0.949		0.846851		0.825959	0.723473	0.37905	0.89209	0.164535	0.089893	0.030551	0.134663	0.069061	0.303512	0.246473	0.07934	0.04102	0.376501		0.224892		0.146151	0.211424	0.002788	0.088979
40	0.798881	1	0.869034	0.886988	0.826315	0.055405	0.654436	0.330625	0.688519	0.699144		0.481347		0.951742	0.495239	0.719937	0.353099	0.160673	0.197121	0.099828	0.224993	0.028386	0.082588	0.074858	0.243595	0.034007	0.326424		0.061597		0.039132	0.048889	0.069798	0.129806
45	0.638947	0.81177	0.614226	0.686508	0.485637	0.048692	0.478779	0.278629	0.647201	0.474762		0.494566		0.981606	0.588785			0.177299	0.021757	0.077313	0.250666	0.095886	0.024598	0.033603	0.060863	0.020025	0.199255		0.035246		0.088235	0.098064
50	0.713463	0.403374	0.865155	0.780854	1		0.359976	0.499464	0.521052	0.360524		0.468046		0.94308	0.398614			0.060265	0.049524	0.04698	0.193317	0.104024		0.008131	0.133213	0.012697	0.030848		0.006907		0.025562	0.048227
55	0.589616		0.627525	0.467464	0.545643		0.231362	0.156057	0.617522	0.103997		0.404127		0.73446	0.029414			0.038402		0.023456	0.105044	0.020656		0.019226	0.016543	0.016917	0.024993		0.016919		0.055221	0.015878
60	0.349647		0.500284	0.458752	0.81415		0.346859	0.202898	0.242248			0.165966		0.843921				0.061446		0.011096	0.072299	0.116203		0.005288	0.010572	0.004703			0.02455		0.039833
65	0.337577		0.1741	0.325893			0.225244	0.343815	0.503691			0.164214		0.779825				0.081821		0.002082	0.154033			0.005298	0.003122	0.01256			0.008179		0.070169
70	0.174208		0.099184	0.154073			0.111001		0.330288			0.204587		0.416066				0.029399		0.002397	0.056249			0.009329		0.024423			0.012313		0.029165
75	0.14019						0.106041		0.352359			0.133316		0.308876				0.034989						0.003292		0.039453			0.0102		0.012615
80							0.051292		0.045626					0.221118										0.001556		0.005113					0.006463

## Sheet: Figure 3P
Figure 3P
Time (s)	Mnn2-GFP						Mnn9-mCherry
	Cisterna 1	Cisterna 2	Cisterna 3	Cisterna 4	Cisterna 5	Cisterna 6	Cisterna 1	Cisterna 2	Cisterna 3	Cisterna 4	Cisterna 5	Cisterna 6
-35	0.013958				0.019654	0.022464	0.010631				0.004915	0.258516
-30	0.079771	0.036689			0.016059	0.128596	0.085737	0.104723			0.137026	0.464327
-25	0.036812	0.015072		0.070845	0.023141	0.059369	0.249569	0.191485		0.135296	0.164872	0.480104
-20	0.021752	0.562983		0.045238	0.078351	0.263708	0.33341	0.679013		0.433596	0.302294	1
-15	0.015313	0.539628	0.002647	0.198344	0.287808	0.295464	0.360471	0.604643	0.255676	0.380738	0.501836	0.578289
-10	0.083556	0.693196	0.104885	0.180414	0.491118	0.507338	0.681212	1	1	0.905614	1	0.556386
-5	0.297536	0.474666	0.32021	0.429	0.649157	0.530561	0.734039	0.621141	0.93495	1	0.783953	0.417634
0	1	0.679971	0.524133	0.340874	0.798993	0.521785	1	0.936917	0.366732	0.611022	0.847349	0.504669
5	0.819992	0.769308	0.661854	1	0.962083	0.685571	0.669015	0.763478	0.644368	0.760726	0.280075	0.257628
10	0.883665	1	1	0.934672	1	0.958459	0.661546	0.87008	0.7027	0.406293	0.075166	0.289688
15	0.846765	0.969669	0.783662	0.705831	0.599904	0.95943	0.373154	0.528809	0.493842	0.153818	0.029908	0.117445
20	0.621891	0.922685	0.549334	0.668476	0.747313	1	0.069248	0.511416	0.254854	0.151545	0.034356	0.110846
25	0.346114	0.692831	0.150935	0.813556	0.230208	0.933658	0.092762	0.192638	0.138943	0.138564	0.022597	0.018078
30	0.679794	0.752374		0.992977	0.02275	0.767202	0.019679	0.064341		0.048182	0.00217	0.089681
35	0.565342	0.573732		0.50396		0.67004	0.027591	0.049245		0.009081		0.122035
40	0.278972	0.492315		0.012401		0.54334	0.104917	0.204811		0.083345		0.074535
45	0.065081	0.348759				0.230246	0.013763	0.15732				0.074294
