# Supplementary material for: Spatiotemporal dissection of the Golgi apparatus and the ER-Golgi intermediate compartment in budding yeast
Source: eLife. 2024 Mar 19;13:e92900. doi: 10.7554/eLife.92900 (PMC10950332; doi:10.7554/eLife.92900)
Supplement: Figure 4—source data 1. [file elife-92900-fig4-data1.xlsx]

## Sheet: Figure 4C
Figure 4C
Grh1	Rer1	Sed5	Vrg4	Sec7
0.205	0.299	0.056	-0.078	-0.015
0.206	0.291	0.096	-0.113	-0.045
0.214	0.036	0.045	0.013	0.019
0.337	0.067	0.182	0.048	0.051
0.098	0.13	0.038	-0.034	0.04
0.31	0.086	0.149	0.003	0.065
0.281	0.44	0.08	-0.026	-0.018
0.171	-0.014	0.049	-0.033	-0.066
0.179	0.157	0.052	-0.018	0.031
0.164	0.351	0.012	0.052	-0.013
0.152	0.36	0.057	0.034	-0.055
0.145	0.16	0.011	-0.006	-0.018
0.21	0.179	-0.035	0.031	-0.076
0.074	0.124	-0.005	0	0.022
0.179	0.084	-0.032	-0.029	0.007
0.139	0.184	0.046	-0.107	-0.041
0.241	0.098	-0.009	-0.1	-0.022
0.13	0.207	0.001	0.031	0.107
0.176	0.33	0.085	-0.012	-0.078
0.29	0.011	0.039	0.014	-0.072
0.285	0.082	-0.015	-0.029	0.015
0.338	0.042	0.051	-0.028	0.063
0.124	0.093	-0.019	-0.025	-0.15
-0.002	0.28		0.047	0.092
0.117			-0.059	-0.097
0.195			-0.007	0.041
0.174			-0.024	-0.145
0.138			-0.076	-0.046
0.205				0.048
0.269				-0.004
0.246				-0.103
0.092				-0.124
0.248				0.072
0.385				0.175
0.254
0.126
0.082
0.043
0.044
0.197
