# Supplementary material for: Spatiotemporal dissection of the Golgi apparatus and the ER-Golgi intermediate compartment in budding yeast
Source: eLife. 2024 Mar 19;13:e92900. doi: 10.7554/eLife.92900 (PMC10950332; doi:10.7554/eLife.92900)
Supplement: Figure 5—source data 1. [file elife-92900-fig5-data1.xlsx]

## Sheet: Figure 5C
Figure 5C
DMSO	BFA
0.585	0.809
0.694	0.693
0.569	0.653
0.633	0.844
0.628	0.77
0.552	0.777
0.54	0.908
0.538	0.776
0.635	0.701
0.502	0.851
0.698	0.855
	0.76
	0.635

## Sheet: Figure 5D
Figure 5D
DMSO	BFA
0.286	0.769
0.305	0.752
0.451	0.126
0.4	0.651
0.425	0.32
0.324	0.227
0.166	0.525
0.169	0.522
0.206	0.641
0.409	0.809
0.286	0.8
	0.831
	0.671
	0.752

## Sheet: Figure5-supplement 1B
Figure5-supplement 1B
DMSO	BFA
1.23664	1.11895
0.918192	0.822284
0.841958	0.776728
1.08478	0.998004
1.0236	1.53856
1.42086	1.31743
1.42535	1.12553
1.35736	0.875251
1.76751	0.796998
1.08768	1.39528
	0.953619
	1.17628
	1.26336
	1.41473
	1.36054
	1.26278
	0.984765
	1.05874
	1.32337
