# Supplementary material for: Spatiotemporal dissection of the Golgi apparatus and the ER-Golgi intermediate compartment in budding yeast
Source: eLife. 2024 Mar 19;13:e92900. doi: 10.7554/eLife.92900 (PMC10950332; doi:10.7554/eLife.92900)
Supplement: Figure 6—source data 1. [file elife-92900-fig6-data1.xlsx]

## Sheet: Figure 6D
Figure 6D
	GFP-Ypt1																		Sys1-iRFP
Time (s)	Cisterna 1	Cisterna 2	Cisterna 3	Cisterna 4	Cisterna 5	Cisterna 6	Cisterna 7	Cisterna 8	Cisterna 9	Cisterna 10	Cisterna 11	Cisterna 12	Cisterna 13	Cisterna 14	Cisterna 15	Cisterna 16	Cisterna 17	Cisterna 18	Cisterna 1	Cisterna 2	Cisterna 3	Cisterna 4	Cisterna 5	Cisterna 6	Cisterna 7	Cisterna 8	Cisterna 9	Cisterna 10	Cisterna 11	Cisterna 12	Cisterna 13	Cisterna 14	Cisterna 15	Cisterna 16	Cisterna 17	Cisterna 18
-85						0.008113		0.423381			0.036649													0.035566		0.555266			0.137596
-80						0.034991		0.304645			0.03405													0.026336		0.613581			0.134179
-75						0.079179		0.394213			0.061965					0								0.078625		0.574415			0.278131					0.22063
-70						0.049216		0.382868			0.142776					0.002468								0.202467		0.671678			0.297067					0.462263
-65						0.069763		0.253638			0.291375					0.008423								0.285576		0.660281			0.590515					0.258356
-60		1.92e-05				0.038004	0.010781	0.293711			0.255569			0.029817	0.000105	0.01294				0.0622				0.31076	0.004406	0.725664			0.631974			0.049727	0.111033	0.278628
-55		0.013324				0.02098	0.008722	0.28126		0.26234	0.909833			0.081216	0.036426	0.009025		0.016151		0.137706				0.418203	0.079595	0.741692		0.224602	0.827814			0.308141	0.334599	0.452119		0.136446
-50		0.095809				0.019782	0.059936	0.452803		0.143386	0.528988		0.03867	0.267796	0.026917	0.001787	0.267537	0.010536		0.301569				0.503046	0.173943	0.821668		0.440967	0.703453		0.232658	0.563774	0.574189	0.462511	0.329632	0.258326
-45		0.151013				0.220056	0.000127	0.447494		0.05635	0.529931		0.070962	0.341707	0.021472	0.040528	0.036914	0.0024		0.347503				0.52477	0.277356	0.720292		0.544616	0.673096		0.257871	0.516643	0.549347	0.506837	0.410244	0.506722
-40		0.273906		0.130349	0.056091	0.104146	0.03736	0.326304		0.045962	0.777244		0.111936	0.108655	0.158529	0.05876	0.08257	0.002453		0.52816		0.785203	0.034502	0.605305	0.365502	0.755643		0.558177	0.83621		0.241665	0.636697	0.713162	0.609715	0.333181	0.243319
-35		0.400244		0.222831	0.022713	0.068382	0.368886	0.355948		0.041916	0.733919		0.135562	0.247354	0.179857	0.336089	0.133902	0.002347		0.63234		0.764071	0.222838	0.747958	0.643347	0.694446		0.566323	0.926635		0.689459	0.82269	0.696461	0.565924	0.390505	0.845784
-30	0	0.41059		0.097259	0.002143	0.209595	0.159551	0.29796		0.038551	0.65472	0.032001	0.016836	0.084809	0.167743	0.202124	0.028135	0.023381	0.064725	0.693197		0.963473	0.222772	0.795944	0.687225	0.620436		0.556024	0.819871	0.706087	0.671647	0.874896	0.774339	0.757159	0.546017	0.841956
-25	0.025463	0.550234		0.096563	0.089926	0.331464	0.352537	0.727564	0.332555	0.218668	0.786272	0.12233	0.051367	0.154462	0.331415	0.387463	0.019447	0.075011	0.098671	0.499153		0.849717	0.58119	0.822814	0.699377	0.602851	0.785353	0.77564	0.917405	0.861859	0.564542	0.807723	0.832046	0.854264	0.707841	0.724927
-20	0.158343	0.332711		0.39463	0.02404	0.418292	0.409339	0.832347	0.074683	0.615746	0.767666	0.200229	0.209775	0.503183	0.523415	0.275646	0.020597	0.047879	0.162496	0.596871		1	0.569885	0.821942	0.934699	0.75084	0.464245	0.867109	1	0.768343	0.456441	0.896671	0.833452	1	0.620755	1
-15	0.217256	0.432702	0.009975	0.513421	0.039315	0.859375	0.692156	0.7216	0.298053	0.076673	0.888435	0.218935	0.463243	0.509585	0.701022	0.298988	0.024754	0.215622	1	0.718532	0.578149	0.71358	1	0.86704	0.647871	0.751107	0.651591	0.746484	0.936585	0.808189	0.784268	0.881435	0.841226	0.660333	0.498423	0.901352
-10	0.629534	0.228587	0.248673	0.294473	0.035121	0.88145	0.53754	0.946652	0.278409	0.745281	0.789599	0.406552	0.461605	0.730065	0.701567	0.272472	0.069667	0.251715	0.362697	0.69023	1	0.85849	0.831856	1	0.931023	0.857422	0.631999	0.755657	0.974935	0.849924	1	0.924347	0.913577	0.575699	0.871743	0.835386
-5	0.535598	0.513208	0.062253	0.326759	0.346276	0.666051	0.41995	0.896624	0.90487	0.322994	0.666366	0.541459	0.733453	0.842183	0.774433	0.211253	0.287897	0.327864	0.112857	0.938783	0.853713	0.782541	0.609776	0.878266	0.951706	0.93953	0.926313	1	0.87474	0.961256	0.378856	1	1	0.701815	1	0.953135
0	0.661583	1	0.20821	0.609895	0.374938	0.815981	0.902976	1	1	0.314822	0.736534	0.842373	0.508028	0.809596	0.873727	0.270004	0.676136	0.552991	0.327838	0.763875	0.588223	0.683589	0.754358	0.675581	1	1	1	0.588245	0.866492	1	0.228373	0.886882	0.868814	0.942443	0.815336	0.81083
5	0.612479	0.712168	0.401132	0.612944	0.471468	0.299984	1	0.914914	0.82301	0.899905	0.684434	1	0.87785	1	1	0.489157	1	0.441428	0.37289	1	0.925636	0.736271	0.514766	0.749323	0.837633	0.779225	0.385795	0.260476	0.904263	0.966383	0.218411	0.695078	0.750042	0.584674	0.568494	0.729327
10	0.94485	0.721808	0.9362	0.704889	0.598114	0.652311	0.855413	0.930161	0.762722	1	0.74772	0.774629	0.984157	0.575757	0.990148	0.451769	0.800973	0.643827	0.671689	0.512994	0.751145	0.511544	0.482707	0.38462	0.975502	0.888708	0.342076	0.513887	0.929093	0.943708	0.144952	0.552383	0.567147	0.423944	0.519777	0.57766
15	1	0.007234	1	0.370481	1	1	0.908429	0.715078	0.640222	0.526622	0.86484	0.746652	1	0.524143	0.981552	0.670189	0.671237	0.704359	0.344357	0.004304	0.680904	0.375048	0.526964	0.276186	0.739877	0.890737	0.212631	0.236068	0.799955	0.753674	0.181103	0.226379	0.504741	0.752924	0.21972	0.596235
20	0.874198	0.004023	0.962465	1	0.938105	0.720231	0.653256	0.823992	0.943077	0.525149	0.953055	0.668565	0.840872	0.379529	0.690223	1	0.690569	0.630462	0.085364	0.002393	0.582933	0.370508	0.384223	0.286773	0.693805	0.834221	0.289998	0.259557	0.858046	0.613251	0.00486	0.276262	0.254372	0.284592	0.334643	0.608848
25	0.916317		0.465928	0.411595	0.896218	0.911567	0.856342	0.715028	0.661225		1	0.57628	0.848094	0.436994	0.707078	0.563612		1	0.956814		0.609953	0.101263	0.186733	0.192496	0.562634	0.959319	0.023379		0.772305	0.639654	0.079537	0.136433	0.143695	0.130738		0.527254
30	0.52025		0.261942	0.443536	0.79053	0.805787	0.703922	0.752672	0.499504		0.942296	0.367054	0.603088	0.610816	0.414271	0.92313		0.449808	0.11759		0.259049	0.156153	0.120447	0.015206	0.457478	0.907794	0.023883		0.752247	0.391125	0.175807	0.125422	0.16523	0.13208		0.409702
35	0.405305		0.001747	0.304384	0.506242	0.646211	0.772654	0.584994	0.271124		0.652168	0.394519	0.642558	0.653565	0.388993	0.674348		0.512925	0.024713		0.055682	0.126196	0.114048	0.000429	0.24378	0.976207	5.72e-05		0.277707	0.066973	0.129278	0.172182	0.049182	0.096865		0.50551
40	0.158087			0.365046	0.089874	0.374701	0.847908	0.542639	0.481977		0.48173	0.381268	0.715183	0.874577	0.258386	0.507695		0.111784	0.0147			0.021498	0.044369	0.000864	0.11469	0.730151	0.000855		0.035187	0.087852	0.265743	0.106087	0.072233	0.091847		0.296008
45	0.221621			0.115939	0.110878	0.440572	0.849419	0.583268	0.169676		0.599974	0.295689		0.647668	0.270442	0.453425		0.185219	0.01754			0.008761	0.087433	0	0.033797	0.63557	0.004906		0.061904	0.015741		0.036916	0.064349	0.042958		0.156629
50	0.239126					0.29387	0.790935	0.673386	0.044915		0.206927	0.269044		0.851208	0.137094	0.296799		0.299185	0.009753					0.000633	0.000599	0.446032	0.008307		0.01045	0.031848		0.046368	0.086025	0.050436		0.043979
55						0.351696	0.691403	0.46713			0.219048	0.320264		0.465466	0.163369			0.292084						0.001887	0.001121	0.364338			0.00016	0.004019		0.017761	0.065441			0.037807
60						0.054283	0.476935	0.500597			0.165999	0.254519		0.576348	0.137853			0.102615						0	0	0.332404			0	0.000251		0.093935	0.07726			0.010551
65						0.060943	0.277937	0.471158			0.09276			0.343507	0.075794									0	0	0.168072			1.37e-05			0.013444	0.020507
70						0.114424	0.395458	0.412123						0.427318	0.100468									0	0.000424	0.163328						0.034322	0.065463

## Sheet: Figure 6H
Figure 6H
	GFP-Ypt1							Sec7-iRFP
Time (s)	Cisterna 1	Cisterna 2	Cisterna 3	Cisterna 4	Cisterna 5	Cisterna 6	Cisterna 7	Cisterna 1	Cisterna 2	Cisterna 3	Cisterna 4	Cisterna 5	Cisterna 6	Cisterna 7
-60	0.022279		0.123862	0.325453	0.766783	0.669036		1.14e-05		0.025934	0.258721	0.2017	0.04513
-55	0.167601		0.105947	0.607559	0.395006	0.704944		0.01159		0.080066	0.309873	0.214899	0.309639
-50	0.744893		0.353914	0.492892	0.558487	0.824266		0.000624		0.034748	0.454318	0.29771	0.367807
-45	0.734819		0.587391	0.700224	0.450917	0.7312		0.015876		0.171917	0.618647	0.211408	0.185939
-40	1		0.496633	0.708195	0.366389	0.711508	0.302152	0.162052		0.253477	0.170103	0.283558	0.119665	0
-35	0.954516		0.563099	0.716627	0.625568	0.662523	0.260683	0.072526		0.308107	0.18972	0.316374	0.249783	0
-30	0.641988	0.421032	0.389657	0.970759	0.780479	0.936677	0.479734	0.026771	0.24564	0.486768	0.582512	0.384678	0.260142	4.29e-05
-25	0.768988	0.860405	0.776606	0.855963	0.743964	1	0.476214	0.004717	0.309913	0.489826	0.486129	0.483474	0.628509	0.002276
-20	0.10585	0.724211	0.659286	0.849857	0.532243	0.638375	0.828961	0.096139	0.192518	0.391199	0.295997	0.524815	0.394044	0
-15	0.130314	0.318621	0.543283	0.851362	0.754389	0.92441	0.643197	0.056658	0.419619	0.601678	0.726717	0.616663	0.577649	0.007843
-10	0.187761	1	0.904529	0.711796	0.852453	0.659097	0.705263	0.064327	0.658805	0.527914	0.85969	0.678369	0.550833	0.068037
-5	0.316915	0.700586	0.583785	1	1	0.776059	0.635445	0.270755	0.679213	0.802065	0.908525	0.797783	0.966355	0.006254
0	0.491732	0.921689	1	0.809734	0.800171	0.480223	1	0.315643	0.5137	0.93599	0.809156	0.792618	0.817567	0.119401
5	0.149926	0.521954	0.468726	0.757938	0.720079	0.545064	0.504629	0.36828	0.784659	1	1	1	0.747914	1
10	0.170733	0.461312	0.41608	0.340027	0.425244	0.582512	0.398918	0.296552	0.854737	0.902265	0.832256	0.866568	0.727996	0.079271
15	0.195358	0.515653	0.097913	0.843055	0.435751	0.694602	0.446384	0.340409	1	0.65855	0.802806	0.815706	0.964157	0.150714
20	0.013861	0.289241	0.367634	0.730801	0.4324	0.624311	0.261642	0.512347	0.481182	0.464056	0.726237	0.817304	0.931437	0.346195
25	0.010829	0.402609	0.438115	0.550219	0.269631	0.572189	0.446514	0.568208	0.522292	0.535089	0.984125	0.820341	1	0.777943
30	0.208042	0.571699	0.134019	0.363577	0.260715	0.326144	0.455005	0.618793	0.528313	0.34725	0.650869	0.772781	0.973859	0.777943
35	0.06418	0.198128	0.20028	0.491414	0.165336	0.324937		0.629112	0.580156	0.310484	0.416313	0.680908	0.990093
40	0.056886	0.125713	0.063996	0.600012	0.083902	0.496051		1	0.330159	0.167554	0.482567	0.698742	0.94293
45	0.17615	0.070098	0.011578	0.35358	0.085463	0.339439		0.622138	0.362797	0	0.101266	0.582775	0.748863
50	0.044767	0.023888		0.115445	0.035344	0.400049		0.538622	0.265385		0.001433	0.454368	0.763255
55	0.160087				0.021378	0.192899		0.775985				0.567888	0.691387
60	0.014591				0.049237	0.334563		0.627113				0.369191	0.497201

## Sheet: Figure 6J
Figure 6J
Ypt1 vs Mnn9	Ypt1 vs Sec7	Mnn9 vs Sec7
0.424	0.489	0.156
0.379	0.514	0.117
0.431	0.334	0.063
0.348	0.592	0.097
0.502	0.562	0.156
0.464	0.595	0.142
0.478	0.511	0.259
0.386	0.561	0.093
0.41	0.441	0.247
0.147	0.434	0.13
0.224	0.393	-0.064
0.354	0.39	0.142
0.218	0.569	-0.045
0.447	0.532	0.111
0.47	0.567	0.319
0.439	0.34	0.136
0.51	0.544	0.222
0.441	0.59	0.261
0.494	0.413	0.296
0.475	0.419	0.043
0.221	0.641	0.051
0.13	0.563	-0.034
0.436	0.596	-0.057
0.396	0.612	0.222
0.472	0.47	0.008
