# Supplementary material for: Spatiotemporal dissection of the Golgi apparatus and the ER-Golgi intermediate compartment in budding yeast
Source: eLife. 2024 Mar 19;13:e92900. doi: 10.7554/eLife.92900 (PMC10950332; doi:10.7554/eLife.92900)
Supplement: Figure 7—source data 1. [file elife-92900-fig7-data1.xlsx]

## Sheet: Figure 7D
Figure 7D
	Gea1-EGFP															Mnn9-mCherry
Time (s)	Cisterna 1	Cisterna 2	Cisterna 3	Cisterna 4	Cisterna 5	Cisterna 6	Cisterna 7	Cisterna 8	Cisterna 9	Cisterna 10	Cisterna 11	Cisterna 12	Cisterna 13	Cisterna 14	Cisterna 15	Cisterna 1	Cisterna 2	Cisterna 3	Cisterna 4	Cisterna 5	Cisterna 6	Cisterna 7	Cisterna 8	Cisterna 9	Cisterna 10	Cisterna 11	Cisterna 12	Cisterna 13	Cisterna 14	Cisterna 15
-35	0.460448								0.475333			0.294254	0.322127			0.047671								0.368171			0.116276	0.409645
-30	0.429561								0.531207			0.730122	0.173183			0.239057								0.456898			0.104894	0.469711
-25	0.304755	0.625511				0.043334	0.135357	0.372013	0.615982			0.884653	0.31264			0.544072	0.089136				0.184276	0.105751	0.13151	0.46789			0.293876	0.49108
-20	0.940806	0.663669	0.239403	0.447201		0.360502	0.230976	0.516986	0.314067	0.395117	0.173108	0.737059	0.687498	0.188955		0.696305	0.339893	0.76998	0.392081		0.355417	0.067559	0.386309	0.64322	0.050705	0.132754	0.353195	0.58837	0.084117
-15	0.726439	0.985059	0.284652	0.934089	0.472199	0.772337	0.437179	0.902838	0.997465	0.490503	0.36793	0.959279	0.795245	0.404955		0.68479	0.390111	0.826912	0.489516	0.391611	0.536543	0.336992	0.500273	0.550225	0.176318	0.344394	0.47515	0.274664	0.190315
-10	0.904857	0.686156	0.452773	0.869392	0.618288	0.690806	0.571688	0.428896	0.991674	0.40791	0.524657	1	1	0.54871	0.668791	0.772736	0.707284	0.819797	0.696654	0.507699	0.618998	0.609004	0.775385	0.770588	0.200756	0.359445	0.568164	0.333539	0.374953	0.294859
-5	1	0.19986	0.808908	1	1	1	0.562638	0.832202	0.858103	0.614241	0.452774	0.656404	0.837822	1	0.582088	0.9711	0.752635	0.963768	0.70681	0.713237	0.858504	0.873142	0.868596	0.966086	0.276423	0.510273	0.683892	0.723752	0.690655	1
0	0.787148	1	1	0.824668	0.720392	0.608252	1	0.87052	1	1	1	0.957216	0.336674	0.62047	0.575591	0.921169	0.966531	0.871623	0.960487	0.87597	0.902109	1	1	1	1	1	0.989176	0.707169	0.684891	0.716347
5	0.885403	0.416629	0.772919	0.549022	0.84989	0.763986	0.719369	1	0.444547	0.630683	0.441957	0.48933	0.222162	0.822368	0.455838	1	1	1	0.919363	1	1	0.955009	0.697358	0.75309	0.660729	0.773376	0.868462	0.781174	1	0.932244
10	0.712194	0.586025	0.454348	0.865758	0.659151	0.788967	0.783455	0.59977	0.523692	0.470219	0.564199	0.675945	0.630669	0.556159	1	0.857479	0.992212	0.931956	1	0.770903	0.917377	0.950673	0.668917	0.63595	0.443501	0.667755	0.919759	1	0.804663	0.771076
15	0.117422	0.554934	0.242476	0.701502	0.175683	0.296857	0.308289	0.33733	0.220623	0.339961	0.351161	0.877178	0.712377	0.412903	0.116743	0.538427	0.88713	0.826481	0.851633	0.382256	0.724441	0.721578	0.362796	0.342115	0.510959	0.612029	1	0.94482	0.584567	0.457239
20	0.472021	0.103263	0.155953	0.924356	0.119055	0.429773	0.314564	0.266962	0.494447	0.569122	0.339429	0.436466	0.574849	0.390736	0.158457	0.496375	0.400321	0.755078	0.933262	0.377189	0.761994	0.621781	0.444295	0.454497	0.557513	0.302709	0.299438	0.875312	0.275914	0.285254
25	0.262471	0.030121	0.184139	0.672761	0.283152	0.116969	0.197878	0.2846	0.142414	0.50515	0.572899	0.492172	0.272715	0.342332	0.259189	0.312538	0.200511	0.649873	0.600705	0.312604	0.357532	0.2545	0.128351	0.157397	0.416344	0.37078	0.182429	0.616955	0.421028	0.374662
30	0.423354		0.147162	0.372853	0.161516					0.465085	0.483241		0.567728		0.173212	0.143496		0.650508	0.576458	0.11426					0.472625	0.059638		0.657691		0.068482
35			0.164173	0.119871							0.502305		0.512921					0.318864	0.492437							0.223159		0.418042

## Sheet: Figure 7H
Figure 7H
Time (s)	Gea2-GFP													Mnn9-mCherry
	Cisterna 1	Cisterna 2	Cisterna 3	Cisterna 4	Cisterna 5	Cisterna 6	Cisterna 7	Cisterna 8	Cisterna 9	Cisterna 10	Cisterna 11	Cisterna 12	Cisterna 13	Cisterna 1	Cisterna 2	Cisterna 3	Cisterna 4	Cisterna 5	Cisterna 6	Cisterna 7	Cisterna 8	Cisterna 9	Cisterna 10	Cisterna 11	Cisterna 12	Cisterna 13
-90			0.233409			0.304491					0.114483					0.368609			0.301154					0.529761
-85			0.201853		0.051473	0.498838					0.133836		0.116261			0.571855		0.562465	0.404182					0.53718		0.212808
-80			0.186314		0.062804	0.378658					0.126		0.073969			0.529902		0.464966	0.536613					0.257818		0.297924
-75			0.224436		0.048123	0.185474	0.332844				0.045952		0.026224			0.582586		0.657194	0.592438	0.702199				0.279375		0.238987
-70			0.156983		0.056067	0.558702	0.269404				0.13775		0.012491			0.607025		0.704194	0.605575	0.758151				0.62578		0.279475
-65			0.117694		0.023322	0.365477	0.37718				0.078218		0.052909			0.470701		0.617723	0.721791	0.744852				0.962375		0.434236
-60			0.230268	0.218581	0.050253	0.635979	0.224822		0.146065		0.019142	0.119809	0.014507			0.650991	0.844673	0.704767	0.625919	0.7715		0.804016		0.726066	0.826678	0.64278
-55			0.286372	0.392507	0.050391	0.410796	0.280215		0.28929		0.014022	0.28144	0.013669			0.695416	0.866434	0.525001	0.773138	1		0.6566		0.569125	0.879032	0.571044
-50	0.00419		0.096785	0.55345	0.066683	0.456341	0.35985	0.279183	0.099848		0.148475	0.639457	0.124945	0.488441		0.548505	0.906363	0.748478	0.929206	0.847605	0.929216	0.671184		0.676348	0.790234	0.837474
-45	0.042436		0.188874	0.504446	0.081866	0.533026	0.318089	0.251677	0.100429	0.384574	0.003676	0.177663	0.006418	1		0.892138	0.897726	0.614888	0.781787	0.776377	1	0.736088	0.772733	0.927542	1	1
-40	0.016604		0.15303	0.411173	0.117992	0.332618	0.203671	0.10464	0.146881	0.298504	0.005773	0.232375	0.001651	0.706301		0.755055	0.754166	0.837505	0.796129	0.838863	0.820849	0.903107	0.796603	1	0.997345	0.935944
-35	0.01917		0.075087	0.280934	0.165267	0.353039	0.134899	0.269216	0.232222	0.085476	0.046422	0.114866	0.038037	0.587772		0.891597	0.970185	1	1	0.53669	0.648708	0.952656	1	0.726277	0.662459	0.959702
-30	0.053884		0.262827	0.296479	0.08823	0.405133	0.256074	0.072373	0.118203	0.152336	0.031334	0.053029	0.022218	0.329632		1	1	0.586453	0.822846	0.806201	0.381786	1	0.716293	0.860683	0.702911	0.841784
-25	0.00883		0.222798	0.317451	0.080623	0.006339	0.168841	0.052738	0.095068	0.100911	0.072094	0.047783	0.04523	0.436283		0.717633	0.900408	0.195671	0.873088	0.596203	0.327094	0.555393	0.505025	0.387549	0.753946	0.653724
-20	0.068151		0.196512	0.404715	0.186588	0.011428	0.193013	0.044164	0.069513	0.25067	0	0.076098	0.018174	0.120233		0.529483	0.641755	0.034427	0.835437	0.583856	0.48573	0.424957	0.453982	0.391986	0.488771	0.637555
-15	0.068879	0.049942	0.361359	0.217344	0.173695	0.294576	0.304405	0.190838	0.105966	0.632582	0.02965	0.06496	0.008652	0.000486	0.611852	0.517736	0.689003	0.017104	0.613359	0.336295	0.176741	0.215373	0.221436	0.377895	0.615488	0.497053
-10	0.163191	0.29671	0.24495	0.139631	0.306986	0.256972	0.427216	0.147342	0.084931	0.497453	0.014569	0.033483	0.136521	0.000596	1	0.417881	0.662661	0.350817	0.524168	0.290354	0.303977	0.154418	0.06156	0.256038	0.375243	0.365755
-5	0.067523	0.287688	0.23163	0.046853	0.452237	0.05113	0.441489	0.313506	0.28354	0.796341	0.045545	0.120465	0.053555	0.022905	0.804693	0.403518	0.646539	0.439219	0.592497	0.18635	0.436187	0.116411	0.056311	0.515745	0.499354	0.103669
0	0.272479	0.267104	0.299587	0.385564	0.42042	0.182033	0.537037	0.347761	0.275849	0.409774	0.079642	0.009719	0.128932	0.000886	0.590237	0.491056	0.932545	0.328995	0.452481	0.12602	0.491439	0.059286	0.007724	0.184097	0.264149	0.296909
5	0.16404	0.527097	0.27469	0.358259	0.623056	0.318866	0.601865	0.323246	0.379002	0.292915	0.35573	0.252802	0.287575	0	0.595722	0.711233	0.715977	0.175868	0.292267	0.038777	0.318762	0.021322	0.011148	0.757394	0.299556	0.184525
10	0.266286	0.747222	0.293565	0.367125	0.446929	0.235343	0.564254	0.282212	0.369494	0.539398	0.284835	0.108084	0.232119	1.7e-05	0.611241	0.193549	0.410945	0.177421	0.118293	0.043207	0.178528	0.039919	0.182161	0.582163	0.242545	0.00422
15	0.471083	1	0.565509	0.124179	0.84783	0.20549	0.713902	0.440742	0.787646	0.799722	0.358908	0.105597	0.331448	0	0.361423	0.029853	0.431279	0.105355	0.023423	0.003665	0.17413	0.1527	0.049412	0.820564	0.089563	0.005045
20	0.621705	0.823114	0.693442	0.189945	0.688869	0.418393	0.617186	0.7269	0.876105	0.744213	0.285853	0.507531	0.654967	0.001542	0.645816	0.02774	0.319623	0.095763	0.001699	0.002461	0.170535	0.060901	0.008788	0.230663	0.03824	0.009085
25	0.712883	0.668544	0.777942	0.288511	0.599743	0.33514	0.463177	0.677239	0.774376	0.594603	0.441454	0.582249	0.660585	0.010609	0.359135	0.040289	0.264258	0.058582	0.000786	0.068239	0.030167	0.039497	0.038869	0.267635	0.05129	0.044848
30	0.682101	0.61445	1	0.411152	0.613927	0.777613	0.752053	0.852603	0.868425	0.975183	0.381986	0.80469	0.739948	8.52e-06	0.120671	0.026603	0.34336	0.014838	0.002933	0.017859	0.032623	0.023577	0.036329	0.461645	0.01978	0.027753
35	0.812459	0.603897	0.923392	1	1	0.995522	0.848393	0.892285	1	1	0.879737	0.986435	0.52663	0	0.170264	0.035778	0.233638	0.139662	0.007848	0.112633	0.000269	0.032709	0.072606	0.310275	0.038179	0.022124
40	0.696969	0.803148	0.963194	0.702757	0.996787	1	0.621806	0.930866	0.902508	0.945749	1	0.455384	0.708867	0.051127	0.167868	0.012004	0.355454	0.075817	0.007821	0.068097	0.005727	0.002964	0.019583	0.252295	0.015677	0.434166
45	0.814369	0.873645	0.818206	0.654207	0.631489	0.815366	0.657007	1	0.882287	0.618027	0.857151	1	1	0.000341	0.10674	0.001343	0.212585	0.074447	0.001965	0.042478	0.035656	0.00562	0.011141	0.240527	0.02427	0.025009
50	1	0.875086	0.771039	0.504276	0.340813	0.983895	0.707497	0.933956	0.789021	0.367867	0.946767	0.829727	0.822422	0.005863	0.024321	0.003426	0.402279	0.032388	0.024758	0.041213	0.000611	0.009397	0.00287	0.146811	0.031421	0.006745
55	0.726109	0.939585	0.479439	0.611527	0.174849	0.83259	0.804234	0.518757	0.808842	0.180872	0.85316	0.734964	0.793459	8.52e-06	0.055811	0.007423	0.311709	0.038591	0.019961	0.025717	3.65e-05	0.058152	0.001745	0.085183	0.008731	0.007995
60	0.753222		0.751497	0.581323		0.925924	1	0.406661	0.96983	0.283481	0.859494	0.698907	0.762218	0.004295		0.000177	0.266444		0.038596	0.00715	8.21e-05	0.074454	0.023494	0.158694	0.012052	0.258576
65	0.529907		0.362317	0.495394		0.651131	0.471795	0.512425	0.959006	0.175157	0.494848	0.491646	0.63207	0		0.000272	0.015303		0.010735	0.002461	0.002073	0.106559	0.015481	0.064468	0.015195	0.009149
70	0.573075			0.745974		0.677929	0.731064	0.333272	0.58925	0.087281	0.605248	0.409187	0.659248	0			0.000173		0.005615	0.000413	0	0.033003	0.007279	0.067953	0.012312	0.001675
75	0.209212			0.716348			0.641989	0.128305	0.358115	0.040977	0.423153	0.634554	0.539134	0			0.004381			0.077018	0	0.115988	0.000658	0.048828	0.003448	4e-05
80	0.223151			0.556137			0.564405		0.372979		0.161031	0.303432	0.447562	0			0.003872			0.119847		0.007464		0.028677	0.00734	0.00587

## Sheet: Figure 7L
Figure 7L
	Gnt1-GFP															Gea2-2x-mCherry
Time (s)	Cisterna 1	Cisterna 2	Cisterna 3	Cisterna 4	Cisterna 5	Cisterna 6	Cisterna 7	Cisterna 8	Cisterna 9	Cisterna 10	Cisterna 11	Cisterna 12	Cisterna 13	Cisterna 14	Cisterna 15	Cisterna 1	Cisterna 2	Cisterna 3	Cisterna 4	Cisterna 5	Cisterna 6	Cisterna 7	Cisterna 8	Cisterna 9	Cisterna 10	Cisterna 11	Cisterna 12	Cisterna 13	Cisterna 14	Cisterna 15
-60							0.06194					0.36088			0.214079							0.038804					0.138242			0.28765
-55						0.228301	0.233955					0.402054			0.277697						0.170047	0.014982					0.073578			0.314914
-50						0.306234	0.34239			0.439592		0.67465			0.4182						0.053656	0.056099			0.039258		0.095777			0.174679
-45	0.090281					0.625893	0.472881	0.107581		0.849032		0.693374			0.615396	0.084964					0.085681	0.038606	0.006718		0.244254		0.034811			0.225474
-40	0.357185					0.733307	0.591215	0.336862		0.635714		0.703149		0.13402	0.705037	0.186507					0.318704	0.0444	0.030098		0.419956		0.170111		0.042222	0.224815
-35	0.393661			0.233908	0.202594	0.719633	0.832509	0.636653		0.61156	0.295112	0.820028		0.589779	0.829702	0.230444			0.1297	0.123021	0.319871	0.021946	0.038527		0.208034	0.025033	0.163515		0.114789	0.199645
-30	0.813809	0.325235	0.57912	0.495378	0.537018	0.98341	0.921135	0.660031		0.735913	0.482166	0.897867		0.792943	0.815672	0.140054	0.0095	0.309662	0.183989	0.080836	0.314408	0.290321	0.060171		0.211529	0.083818	0.136307		0.132768	0.330058
-25	0.922497	0.489195	0.766385	0.668262	0.674871	1	0.908264	0.890764		0.999641	0.369553	0.898981		0.94158	1	0.241465	0.164041	0.108997	0.22777	0.449174	0.174777	0.511366	0.239553		0.25992	0.022405	0.378407		0.10571	0.376557
-20	0.611013	1	0.761363	1	0.910125	0.91826	0.804791	0.755373		0.926138	0.783505	0.86148		0.943797	0.864642	0.207539	0.299296	0.438466	0.352148	0.730777	0.679022	0.397958	0.03338		0.214874	0.036702	0.443322		0.159208	0.610162
-15	0.682484	0.820754	1	0.801333	1	0.792784	1	0.886945	0.387099	1	0.776742	0.953088	0.458407	1	0.822483	0.204274	0.220983	0.131405	0.42507	0.809736	0.347461	0.626375	0.262524	0.171401	0.615068	0.140316	0.413009	0.215474	0.144245	0.593887
-10	1	0.718932	0.897767	0.739251	0.926358	0.662354	0.876641	1	0.751518	0.925108	0.732908	1	0.761869	0.995973	0.794707	0.573673	0.175029	0.211397	0.412841	0.615268	0.312594	0.412152	0.041537	0.413945	0.547002	0.20402	0.523487	0.123883	0.351948	0.679439
-5	0.958539	0.912234	0.870904	0.748121	0.793891	0.669997	0.635703	0.780228	1	0.919801	1	0.778388	1	0.901415	0.53979	0.522713	0.180517	0.371934	0.061577	0.661119	0.542628	0.944056	0.310058	0.656772	0.525536	0.427887	0.522342	0.392151	0.557009	0.779752
0	0.372957	0.522762	0.925993	0.563372	0.799716	0.558289	0.577878	0.716606	0.739373	0.722873	0.820186	0.75696	0.978507	0.661832	0.391794	0.737455	0.191786	0.236302	0.14249	0.331132	0.569776	0.853344	0.592285	0.793884	0.292338	0.784935	0.54567	0.45872	0.336107	0.579343
5	0.153204	0.987721	0.964355	0.516956	0.857329	0.331991	0.077658	0.618375	0.649917	0.384699	0.7571	0.557865	0.847383	0.275193	0.172249	0.717761	0.35018	0.686357	0.601643	0.60617	0.581706	0.918299	0.786187	0.837041	0.537909	0.289826	0.83468	0.361157	0.670225	0.757727
10	0.065897	0.532604	0.724491	0.513466	0.746241	0.078471	0.02806	0.430642	0.24792	0.248567	0.639498	0.252509	0.756447	0.064644	0.027221	1	0.468177	0.531448	0.583202	0.71111	0.756249	0.885466	0.457072	1	0.583822	1	1	1	0.94727	0.856233
15	0.038392	0.428213	0.860412	0.123398	0.831868	0.00901	0.029454	0.310714	0.213586	0.109542	0.323481	0.027926	0.63036	0.024543	0.003005	0.329238	0.532475	1	0.736209	1	0.682196	1	1	0.890915	0.6988	0.246934	0.529978	0.568773	1	0.579617
20	0.053159	0.049617	0.671287	0.242557	0.467473	0.073525	0.006882	0.040896	0.058189	0.04074	0.050521		0.35565	0.00491	0.002388	0.62057	1	0.590335	1	0.701265	0.952677	0.456008	0.811916	0.880829	1	0.25836		0.861232	0.847419	0.421173
25	0.029802	0.105214	0.29668	0.188126	0.257382	0.006005	0.060374	0.055228	0.221265	0.02325	0.035852		0.357896	0.008212	0.00849	0.354148	0.827075	0.638219	0.964313	0.975854	1	0.70998	0.826637	0.908703	0.940015	0.768126		0.805813	0.568174	0.671969
30		0.038223	0.027016	0.053845	0.033963	0.001353	0.009691	0.013385	0.152521	0.031592	0.034478		0.094895	0.004193	0.006899		0.472854	0.62238	0.362707	0.804	0.600863	0.420805	0.665347	0.765535	0.371351	0.47177		0.541044	0.394128	1
35		0.027531	0.023303	0.015366	0.036532	0.002417	0.005597	0.021595	0.101574	0.052518	0.041965		0.05277	0.004719	0.01586		0.561586	0.904195	0.482907	0.729771	0.271822	0.444159	0.932932	0.785144	0.276805	0.648506		0.436144	0.232351	0.558372
40		0.01885	0.018293	0.024556	0.037852	0.020515	0.01426		0.083381	0.016739	0.032139		0.141055	0.002985	0.003255		0.266773	0.592722	0.571283	0.493995	0.195148	0.205229		0.437229	0.193604	0.275374		0.49923	0.449875	0.352978
45		0.036671	0.024131	0.00393	0.128162	0.011587	0.014761		0.039108				0.202905	0.002127	0.006409		0.292293	0.639647	0.197117	0.480065	0.079506	0.145851		0.144334				0.238016	0.010088	0.151294
50		0.110583	0.018922	0.052795			0.002308						0.099826		0.013784		0.123045	0.382166	0.213982			0.026749						0.396389		0.266634

## Sheet: Figure 7P
Figure 7P
	GFP-Tlg2																					Gea2-2x-mCherry
Time (s)	Cisterna 1	Cisterna 2	Cisterna 3	Cisterna 4	Cisterna 5	Cisterna 6	Cisterna 7	Cisterna 8	Cisterna 9	Cisterna 10	Cisterna 11	Cisterna 12	Cisterna 13	Cisterna 14	Cisterna 15	Cisterna 16	Cisterna 17	Cisterna 18	Cisterna 19	Cisterna 20	Cisterna 21	Cisterna 1	Cisterna 2	Cisterna 3	Cisterna 4	Cisterna 5	Cisterna 6	Cisterna 7	Cisterna 8	Cisterna 9	Cisterna 10	Cisterna 11	Cisterna 12	Cisterna 13	Cisterna 14	Cisterna 15	Cisterna 16	Cisterna 17	Cisterna 18	Cisterna 19	Cisterna 20	Cisterna 21
-50				0.006793					0									0.052577							0.150825					0.328773									0.333649
-45	0.003448			0.000252					0				0.000619					0.177033				0.039042			0.222798					0.334755				0.048916					0.116289
-40	0.003842	0.012162		0.001453				0.002254	0			0.001351	0.046576					0.178476		0.042049		0.165345	0.108733		0.165125				0.043928	0.467791			0.097764	0.089249					0.188807		0.082041
-35	0.007022	0.036765	0.014042	0.001668	0.009832			0.003918	0			0.015189	0.000394					0.267939	0.004805	0.02753		0.091719	0.29958	0.235345	0.455817	0.124825			0.386081	0.456828			0.18672	0.198777					0.258042	0.101433	0.47265
-30	0.01262	0.032773	0.088819	0.032502	0.051387			0.005388	0.010157	0.040863		0.060718	0.045998	0.001862			0.078778	0.276348	0.033923	0.069407		0.244667	0.368142	0.287966	0.577285	0.155995			0.363058	0.834821	0.185195		0.29262	0.227884	0.018557			0.131961	0.278681	0.376743	0.576429
-25	0.079961	0.150575	0.171688	0.06213	0.010467			0.149517	0.05868	0.03095		0.125769	0.025465	0.054633	0.016393	0.057428	0.095869	0.23239	0.084847	0.20013	0.027744	0.291278	0.334079	0.495688	0.883802	0.312003			0.369675	0.464981	0.935195		0.530475	0.232173	0.549909	0.06077	0.226996	0.565874	0.200565	0.566738	0.588337	0.61233
-20	0.284498	0.336767	0.394662	0.240006	0.157433	0.025997	0.018174	0.345517	0.305945	0.169802	0.298962	0.366999	0.403888	0.199326	0.034465	0.05271	0.048816	0.201172	0.394577	0.243041	0.06698	0.546302	0.583371	0.486094	0.797258	0.116639	0.133005	0.102949	0.445056	0.655161	0.925645	0.254538	0.689748	0.683948	0.887651	0.277294	0.438929	0.489182	0.302421	0.685058	0.661966	0.699952
-15	0.170201	0.5196	0.672829	0.268311	0.34137	0.152242	0.15624	0.44768	0.50878	0.019164	0.680712	0.662907	0.385916	0.546811	0.050827	0.179093	0.092001	0.424566	0.686817	0.390077	0.270103	0.515301	0.345446	0.555171	0.912022	0.366132	0.490787	0.615758	0.732702	0.678879	0.717734	0.625491	0.764545	0.793187	0.863282	0.404271	0.210813	0.941957	0.940562	0.960119	0.930424	1
-10	0.394127	0.528748	0.93764	0.28217	0.246355	0.008862	0.119428	0.696199	0.693579	0.311501	0.672298	0.853856	0.542653	0.516386	0.436761	0.203104	0.70904	0.397781	0.758526	0.62585	0.502495	0.757001	0.612128	0.286449	0.919086	0.424006	1	1	0.728017	0.813099	1	0.832703	0.800445	0.75606	0.807641	0.57819	1	0.649913	0.406038	0.824851	0.672355	0.747867
-5	0.419132	0.574607	0.98445	0.412253	0.483763	0.533306	0.278748	0.753027	0.700687	0.748573	0.514192	1	0.730159	1	0.868045	0.476349	0.496951	0.565509	0.878811	0.670647	0.662062	1	0.644428	1	0.932301	0.638976	0.79893	0.971136	0.815556	1	0.862826	1	0.987065	1	0.946389	0.88954	0.803126	0.760179	1	0.916623	0.660229	0.627631
0	0.881894	1	0.942081	0.781538	0.788285	0.748533	0.251172	0.823818	0.755052	0.960609	0.995738	0.957077	0.801721	0.669131	1	0.476996	1	0.810659	1	0.882124	0.825108	0.814847	1	0.552576	1	1	0.62228	0.869522	1	0.699053	0.872047	0.609107	0.98087	0.570079	0.951818	1	0.880527	1	0.955682	1	1	0.429949
5	0.862329	0.696252	1	1	1	0.838662	0.457725	1	1	0.673098	0.677573	0.904539	1	0.752084	0.926993	0.792157	0.712044	0.851237	0.765823	1	0.965403	0.586146	0.624966	0.023415	0.930779	0.654757	0.416441	0.982622	0.675181	0.946571	0.703548	0.486165	1	0.568695	1	0.915328	0.659809	0.519978	0.887154	0.702725	0.788331	0.271466
10	1	0.865628	0.802887	0.682683	0.991461	0.702366	1	0.764374	0.922187	0.99902	1	0.961207	0.795683	0.846367	0.929549	1	0.773314	1	0.732671	0.962072	0.860697	0.609271	0.966615	0.048102	0.811773	0.616777	0.79053	0.67338	0.656176	0.728555	0.6406	0.63418	0.818174	0.439862	0.765355	0.909063	0.458596	0.724027	0.288634	0.342532	0.501383	0.146893
15	0.702918	0.908378	0.87539	0.670813	0.782577	1	0.748452	0.931294	0.770576	1	0.805921	0.895649	0.6369	0.743141	0.728436	0.807762	0.912076	0.854084	0.62121	0.977847	1	0.533551	0.699942	0.185126	0.454896	0.127326	0.143341	0.562808	0.357844	0.486316	0.704277	0.630058	0.79779	0.471283	0.173634	0.735669	0.300115	0.390368	0.153595	0.166949	0.540932	0.070968
20	0.794752	0.657315	0.747191	0.428347	0.730823	0.758447	0.57715	0.826907	0.739947	0.788392	0.874796	0.857577	0.486977	0.658136	0.525726	0.671945	0.828416	0.965929		0.958085	0.937828	0.488197	0.629582	0	0.306299	0.017379	0.221519	0.521607	0.374696	0.093142	0.569612	0.197506	0.769182	0.08313	0.140302	0.315478	0.081978	0.160627	0.396055		0.3408	0.050608
25	0.71721	0.572245	0.600944	0.80313	0.814957	0.845793	0.831041	0.802524	0.741757	0.863494	0.457136	0.943768	0.574083	0.400521	0.097074	0.440329	0.599968	0.713256		0.792144	0.928872	0.346209	0.167421	0.000846	0.026064	0.001166	0.066376	0.283729	0.152183	0.192882	0.219114	0.179035	0.798571	0.033701	0.11311	0.094076	0.189263	0.19745	0.185486		0.259462	0.037286
30	0.899502	0.811752	0.323132	0.592148	0.677975	0.596992	0.587908	0.480465	0.475071	0.674252	0.300644	0.920026	0.25357	0.182926	0.053718	0.24694	0.553235	0.610996		0.773886	0.792087	0.354239	0.029664	0.001188	0.03167	0.008893	7.47e-05	0.151313	0.104489	0.039182	0.234008	0.371977	0.352131	0.00704	0.012686	0.03381	0.102617	0.151504	0.037551		0.048097	0.002424
35	0.73936	0.774029	0.06131		0.720071	0.29626	0.452302	0.436017	0.246731	0.243823	0.041707	0.9387	0.082478	0.255233			0.438304	0.350151		0.597139	0.583081	0.02419	0.055619	0		0.006352	0.023541	0.135684	0.081435	0.019793	0.13223	0.110494	0.283585	0.000891	0.017111			0.028285	0.228336		0.289411	0.086004
40	0.915851	0.72484	0.000134		0.370208	0.414357	0.418825	0.248109	0.010118	0.270444	0.000183	0.793244	0.078477	0.057557			0.271137	0.227617		0.439121	0.493079	0.022136	0.077637	0		0.004767	5.75e-06	0.030296	0.023998	0.03787	0.109485	0.058255	0.273375	0.000336	0.002971			0.086636	0.20135		0.095888	0.110775
45	0.641245	0.68406			0.005627	0.024355	0.194191	0.00594				0.7867		0.000457			0.021781	0.1544		0.422682	0.146247	0.009903	0.016555			0.053814	0.001373	0.043167	0.011638				0.05367		0.003093			0.221235	0.226892		0.015429	0.009497
50	0.491397	0.302893					0.022795					0.698565								0.111952	0.077116	0.049024	0.005031					0.018069					0.055461								0.012625	0.027481
55	0.164464	0.257583										0.35709										0.010026	0.023272										0.01441

## Sheet: Figure 7T
Figure 7T
	Gea2-GFP							Sec7-tagRFP
Time (s)	Cisterna 1	Cisterna 2	Cisterna 3	Cisterna 4	Cisterna 5	Cisterna 6	Cisterna 7	Cisterna 1	Cisterna 2	Cisterna 3	Cisterna 4	Cisterna 5	Cisterna 6	Cisterna 7
-35	0.072165						0.0427	0.003578						0.046758
-30	0.459281			0.210958			0.349311	0.0158			0.093704			0.052314
-25	0.461648		0.295552	0.638247	0.683668		0.383379	0.010453		0.071882	0.187856	0.439897		0.30269
-20	1		0.416601	0.784157	0.673879		0.617925	0.053431		0.074938	0.225677	0.209446		0.212199
-15	0.805624	0.754628	0.569469	1	1	0.469353	1	0.128852	0.343452	0.174094	0.399668	0.636414	0.102317	0.353796
-10	0.849799	0.816614	0.584884	0.841919	0.976438	0.978975	0.75414	0.293091	0.38937	0.109281	0.150736	0.748547	0.471127	0.59227
-5	0.909409	1	0.75418	0.551931	0.721144	1	0.933338	0.40962	0.665292	0.233226	0.182351	0.63407	0.639129	0.633566
0	0.890039	0.969543	1	0.798346	0.541437	0.830165	0.309946	0.608647	0.702138	1	0.455589	0.830775	0.757607	0.993829
5	0.799177	0.948135	0.532567	0.768789	0.520124	0.905009	0.203314	0.770842	1	0.560159	0.477884	0.984741	1	0.940862
10	0.678384	0.830124	0.781244	0.626902	0.247238	0.53485	0.083945	0.758838	0.818072	0.85971	0.702945	0.930154	0.97689	0.852133
15	0.672755	0.68052	0.244066	0.707527	0.173568	0.261115	0.033099	0.825011	0.818859	0.914906	1	0.887569	0.990628	0.79148
20	0.750022	0.436795	0.253818	0.479724	0.01776	0.003014	0.005517	0.880072	0.60996	0.899949	0.913332	1	0.460086	1
25	0.512095	0.320777	0.02336	0.380216	0.000583	0	0.001357	1	0.624238	0.976446	0.773112	0.757843	0.501133	0.631694
30	0.136673	0.236037	0.01174	0.184034	0	0	1.34e-05	0.819975	0.756948	0.883773	0.773858	0.762265	0.630912	0.467181
35	0.379478	0.161433	0.016765		1.12e-05	0	0	0.766491	0.768781	0.881828		0.774805	0.452118	0.014329
40	0.32239	0.031548			4.78e-05	0		0.749263	0.77678			0.85565	0.473828
45	0.257606	0.004968			0	4.68e-05		0.60662	0.912806			0.624006	0.521175
50	0.01165	0.001517			0	0.000579		0.55356	0.861883			0.668326	0.136038
55	0.003078	0			0.005854			0.531304	0.623282			0.69118
60	0.002115	1.5e-05			0.009568			0.484797	0.696652			0.001508
