# Supplementary material for: Spatiotemporal dissection of the Golgi apparatus and the ER-Golgi intermediate compartment in budding yeast
Source: eLife. 2024 Mar 19;13:e92900. doi: 10.7554/eLife.92900 (PMC10950332; doi:10.7554/eLife.92900)
Supplement: Figure 8—source data 1. [file elife-92900-fig8-data1.xlsx]

## Sheet: Figure 8D
Figure 8D
	EGFP-Imh1																Sys1-iRFP
Time (s)	Cisterna 1	Cisterna 2	Cisterna 3	Cisterna 4	Cisterna 5	Cisterna 6	Cisterna 7	Cisterna 8	Cisterna 9	Cisterna 10	Cisterna 11	Cisterna 12	Cisterna 13	Cisterna 14	Cisterna 15	Cisterna 16	Cisterna 1	Cisterna 2	Cisterna 3	Cisterna 4	Cisterna 5	Cisterna 6	Cisterna 7	Cisterna 8	Cisterna 9	Cisterna 10	Cisterna 11	Cisterna 12	Cisterna 13	Cisterna 14	Cisterna 15	Cisterna 16
-45					0.293328						0.095676				0.168666						0.119316						0.305291				0.439229
-40				0.015767	0.260553	0.042261					0.175087				0.291374					0.179756	0.438626	0.458499					0.496339				0.488043
-35				0.175622	0.240271	0.025238					0.495089			0.134324	0.130557					0.539178	0.374208	0.684262					0.516777			0.072478	0.45345
-30			0.050332	0.464528	0.225279	0.138299					0.478655	0.100144	0.068784	0.165937	0.240735				0.154828	0.164067	0.584739	0.575746					0.822221	0.120773	0.347083	0.212994	0.665918
-25	0.146687		0.192791	0.623306	0.355618	0.366909	0.139303		0.029822		0.777546	0.138279	0.074958	0.179396	0.225268	0.001306	0.19938		0.358638	0.444605	0.631864	0.708155	0.358542		0.302676		0.614869	0.133925	0.257975	0.11322	0.761303	0.025543
-20	0.505292		0.338521	0.726707	0.603407	0.573366	0.231864	0.06874	0.229313		0.802052	0.400134	0.283947	0.212714	0.585226	0.027221	0.24032		0.889519	0.224213	0.651497	0.677376	0.337237	0.155305	0.389047		0.699579	0.318911	0.1759	0.290069	0.686005	0.019616
-15	0.598616	0.446535	0.581187	0.94504	0.737869	0.899652	0.441436	0.195907	0.222153		0.933251	0.573518	0.676304	0.256578	0.753097	0.857853	0.495033	0.337866	0.35732	0.294479	0.745981	0.707962	0.608972	0.235341	1		0.440564	0.459615	0.878313	0.514836	0.996014	0.83688
-10	0.616076	0.91509	0.656003	0.834534	0.809889	1	0.788559	0.426706	0.822173	0.232838	1	0.6896	0.818777	0.694919	0.634786	0.739068	0.675306	0.72653	0.502891	0.560639	0.855393	0.857071	0.728444	0.358469	0.680065	0.563592	0.452116	0.598632	0.295719	0.93262	0.775996	0.539146
-5	0.740003	0.835102	0.999956	0.949253	0.951689	0.759275	0.945586	0.742086	0.662123	0.301192	0.867633	0.772593	1	0.660117	0.778122	0.888558	0.876015	1	0.701606	1	0.963802	0.591516	0.648763	0.500165	0.544067	0.183284	0.459672	0.578909	0.975809	0.61984	0.784769	1
0	1	0.924661	1	0.971311	0.908886	0.858261	1	1	0.711739	1	0.72229	1	0.96731	1	0.915409	0.880362	1	0.669361	1	0.921137	1	0.641471	1	1	0.439884	1	0.924751	1	0.60965	1	1	0.924439
5	0.936542	1	0.628096	1	1	0.719571	0.976294	0.881244	0.656403	0.758963	0.220089	0.609271	0.708602	0.640656	1	1	0.945839	0.91331	0.610968	0.83387	0.848104	0.794988	0.884857	0.830282	0.489552	0.82421	0.364521	0.602723	0.355271	0.736456	0.96978	0.873715
10	0.698641	0.761859	0.817563	0.924683	0.68748	0.88621	0.959214	0.918794	0.562278	0.641239	0.011817	0.633141	0.790587	0.458158	0.655217	0.705812	0.753506	0.848863	0.970606	0.305738	0.668254	0.625589	0.657933	0.786222	0.460813	0.450517	1	0.622403	1	0.774331	0.846227	0.851426
15	0.707243	0.72714	0.391162	0.448782	0.405109	0.500344	0.362752	0.954533	1	0.868419	0	0.66615	0.391652	0.462358	0.405098	0.506739	0.805658	0.641523	0.574898	0.091057	0.437118	1	0.367027	0.621145	0.570139	0.315951	0.55075	0.794723	0.773126	0.82796	0.932819	0.499051
20	0.785258	0.716988	0.052704	0.062629	0.298443	0.554885	0.281852	0.705607	0.424458	0.664044	0	0.23091	0.132482	0.437097	0.18608	0.266547	0.910569	0.939755	0.179295	0.1246	0.230282	0.808467	0.224195	0.608221	0.253596	0.523423	0.185064	0.409835	0.662193	0.893314	0.710813	0.531364
25	0.494737	0.57924	0.004577		0.022583	0.374677		0.479825	0.636113	0.55511		0.039682	0.024157	0.425682	0.008681	0.116524	0.99751	0.653767	0.034132		0.07243	0.886348		0.438257	0.505703	0.545673		0.19194	0.859951	0.58671	0.248506	0.337887
30	0.164233	0.311407				0.348862		0.611211	0.262941	0.384338			0.112227	0.387775	0.005798	0.05076	0.750065	0.648551				0.78767		0.516511	0.487958	0.350257			0.261205	0.446394	0.074348	0.111299
35	0.08263	0.154148				0.399563		0.1853	0.033536	0.152342				0.447405		0.009769	0.878997	0.649717				0.933643		0.204779	0.119589	0.358657				0.42122		0.284512
40	0.020445	0.053819				0.286813								0.232787			0.720294	0.229498				0.794803								0.631433
45	0.000293	0.00036				0.174588								0.309382			0.621941	0.185908				0.581471								0.287526
50	0.000563					0.201048								0.326589			0.481178					0.701959								0.154738
55	0.00152					0.093327								0.147333			0.730054					0.513506								0.193153
60	0					0.01919								0.033388			0.626295					0.243814								0.045734

## Sheet: Figure 8H
Figure 8H
	Gga1-GFP													Sec7-tagRFP
Time (s)	Cisterna 1	Cisterna 2	Cisterna 3	Cisterna 4	Cisterna 5	Cisterna 6	Cisterna 7	Cisterna 8	Cisterna 9	Cisterna 10	Cisterna 11	Cisterna 12	Cisterna 13	Cisterna 1	Cisterna 2	Cisterna 3	Cisterna 4	Cisterna 5	Cisterna 6	Cisterna 7	Cisterna 8	Cisterna 9	Cisterna 10	Cisterna 11	Cisterna 12	Cisterna 13
-45		0.03039		0.003115		0.028139	0.000354								0.53114		0.057387		0.823916	0.498735
-40	0.027473	0.006129		0.003533		0.273967	0.002547							0.048871	0.452016		0.079911		0.58549	0.487453
-35	0.005054	0.127435		0.009802		0.452769	0.015343				0.014567			0.447662	0.517482		0.174143		0.338865	0.546213				0.059691
-30	0.031541	0.064341		0.010962	0.004134	0.683588	0.004268	0.167907			0.09473			0.584934	0.494079		0.26243	0.749574	0.703572	0.530765	0.106013			0.421289
-25	0.00815	0.015564		0.049018	0.086089	0.752847	0.06198	0.123544			0.16031			0.459719	0.669017		0.336571	0.39742	0.616316	0.681879	0.213967			0.6695
-20	0.067164	0.029542	0.149687	0.054859	0.01394	0.537336	0.175194	0.397354			0.008051	0.059232		0.551808	0.570693	0.369876	0.718531	1	0.679429	0.673357	0.38637			0.636726	0.588099
-15	0.151976	0.236725	0.173359	0.106663	0.106148	0.748139	0.071883	0.415685		0.179024	0.028907	0.420926	0.077723	0.927497	0.65788	0.62428	0.572005	0.931253	1	0.382305	1		0.831574	0.46031	0.46619	0.356453
-10	0.343823	1	0.071156	0.174435	0.076635	0.520004	0.313806	0.664218	0.154376	0.452546	0.238979	0.669103	0.343053	1	0.8116	0.604102	0.86737	0.770482	0.993887	1	0.699746	0.152149	0.954988	1	0.822453	0.543604
-5	0.007239	0.293871	0.325153	0.365021	0.041229	0.635332	0.15377	0.163447	0.124597	0.747306	0.277011	0.636611	0.214254	0.899852	0.412365	1	1	0.995825	0.823728	0.65832	0.664738	0.158729	1	0.467127	0.76959	1
0	0.175201	0.303743	0.944181	0.61729	0.010479	0.470145	0.377111	0.43443	1	0.564011	0.842939	0.460235	0.187534	0.743196	0.430448	0.225349	0.790437	0.753604	0.66163	0.707523	0.571615	1	0.776846	0.337812	1	0.60609
5	0.822435	0.333794	1	1	0.085229	0.416003	0.974813	0.735201	0.54342	1	0.32261	1	0.041275	0.822447	0.505167	0.203131	0.816299	0.700841	0.643305	0.557087	0.477552	0.24592	0.506923	0.343525	0.821997	0.618868
10	0.569734	0.113033	0.38342	0.963709	0.097224	0.785889	1	0.595133	0.607651	0.618952	1	0.467336	1	0.758847	0.554249	0.958734	0.655979	0.694233	0.649606	0.209631	0.227137	0.690821	0.67569	0.491261	0.732768	0.720637
15	1	0.356734	0.068817	0.906794	0.597087	0.920403	0.836336	0.814033	0.781801	0.981575	0.267676	0.337469	0.213097	0.669857	1	0.39248	0.419119	0.605609	0.393062	0.152104	0.233704	0.276475	0.356938	0.110163	0.521819	0.438458
20	0.38661	0.262452	0.110352	0.564174	0.982725	1	0.34688	1	0.545108	0.537978	0.062689	0.343267	0.303477	0.30014	0.71546	0.055876	0.368539	0.458374	0.444401	0.193545	0.584993	0.176791	0.573313	0.018282	0.471988	0.170616
25	0.801284	0.184956		0.33088	1	0.766843	0.24189	0.534459	0.822512	0.107526		0.491101	0.055878	0.250936	0.632066		0.347342	0.478412	0.378317	0.096777	0.585274	0.018707	0.115689		0.303569	0.081836
30	0.141321	0.354397		0.505477	0.507719	0.618456	0.014458	0.717973	0.607747	0.011745		0.109913	0.058661	0.224234	0.284994		0.348702	0.252079	0.077507	0.05518	0.018334	0.106113	0.042115		0.152677	0
35	0.050599	0.007691		0.947396	0.705966	0.264994	0.023002	0.5332	0.589796			0.018121		0.036848	0.362418		0.45932	0.163857	0.051395	3.21e-05	0.151799	0.014191			0.013125
40		0.095422		0.961019	0.342732	0.081005		0.606971	0.455164						0.138238		0.406012	0.06428	0.000163		0.093916	0.000753
45		0.09874		0.21803	0.136534	0.002068		0.050747	0.069905						0.046358		0.193822	0.051196	1.88e-05		0.010192	0.199884

## Sheet: Figure 8J
Figure 8J
Mnn9	Sec21	Sys1	Sec7
0.494	0.792	0.751	0.489
0.42	0.637	0.79	0.666
0.445	0.695	0.674	0.502
0.412	0.799	0.742	0.513
0.453	0.654	0.694	0.638
0.417	0.771	0.743	0.537
0.528	0.642	0.559	0.472
0.447	0.491	0.534	0.584
0.479	0.753	0.697	0.708
0.475	0.594	0.645	0.502
0.421	0.75	0.672	0.537
0.529	0.686	0.719	0.451
0.468	0.67	0.687	0.621
0.448	0.758	0.712	0.6
0.53	0.715	0.715	0.577
0.593	0.744	0.722	0.61
0.44	0.704	0.697	0.627
0.577	0.652	0.736	0.435
0.327	0.677	0.666	0.43
0.467	0.767	0.681	0.493
0.473	0.678	0.644	0.575
0.464	0.641	0.616	0.562
0.465	0.625	0.689	0.549
0.272	0.63	0.643	0.534
0.499	0.775	0.775	0.607
0.509	0.703	0.596	0.504
0.372	0.688	0.722	0.582
0.496	0.732	0.749	0.613
0.429	0.827	0.799	0.53
0.553	0.738	0.644	0.484
0.504	0.765	0.702	0.538
0.526	0.681	0.687	0.69
0.432	0.739	0.67	0.653
0.471	0.759	0.625	0.573
0.469	0.78	0.7	0.596
0.358	0.663	0.731	0.418
0.517		0.599	0.571
0.447		0.796	0.529
0.454		0.785	0.513
0.506			0.4565
0.59
0.435
0.538
0.507
0.425
0.51

## Sheet: Figure 8N
Figure 8N
	Apl6-GFP													Sys1-iRFP
Time (s)	Cisterna 1	Cisterna 2	Cisterna 3	Cisterna 4	Cisterna 5	Cisterna 6	Cisterna 7	Cisterna 8	Cisterna 9	Cisterna 10	Cisterna 11	Cisterna 12	Cisterna 13	Cisterna 1	Cisterna 2	Cisterna 3	Cisterna 4	Cisterna 5	Cisterna 6	Cisterna 7	Cisterna 8	Cisterna 9	Cisterna 10	Cisterna 11	Cisterna 12	Cisterna 13
-65	0.054931		0.355064			0.274298				0.086782				0.246164		0.479956			0.044166				0.112883
-60	0.347397		0.464188			0.446657				0.003877				0.407509		0.652588			0.100123				0.091987
-55	0.057735		0.515241			0.563163	0.101182			0.005974				0.510745		0.640771			0.485239	0.695027			0.15061
-50	0.055628		0.605552			0.160785	0.141593		0.021241	0.027765				0.30967		0.745396			0.491018	0.864083		0.074031	0.244719
-45	0.023216		0.69961			0.209526	0.196393	0.255699	0.059245	0.049195	0.074105		0.285837	0.57323		0.895534			0.652555	0.947633	0.060473	0.279244	0.184441	0.404852		0.11232
-40	0.250544		0.991633	0.027465		0.407415	0.284817	0.080332	0.166262	0.077789	0.158373	0.111781	0.359858	0.525953		0.733681	0.268228		0.882591	0.9925	0.424933	0.310219	0.399027	0.556106	0.187393	0.622673
-35	0.25688	0.048409	0.827038	0.068376		0.528284	0.359271	0.167184	0.331978	0.217614	0.241709	0.19915	0.305485	0.584582	0.145551	0.884796	0.274541		0.976259	0.99859	0.697688	0.335833	0.691924	0.515243	0.377422	0.670978
-30	0.190858	0.032808	1	0.010905	0.046248	0.372938	0.236918	0.332021	0.489158	0.406765	0.234421	0.28766	0.11692	0.604349	0.275659	0.828093	0.401797	0.105881	0.74411	0.990198	0.492863	0.41976	0.540034	0.76799	0.590963	0.867038
-25	0.336752	0.027259	0.785259	0.125864	0.329657	0.556021	0.490146	0.447907	0.958167	0.247137	0.344036	0.227074	0.772459	0.668	0.139698	0.582311	0.656961	0.24797	0.857682	1	0.616771	0.715704	0.653988	0.789566	0.624181	0.824436
-20	0.337442	0.364275	0.253239	0.136188	0.058936	0.796145	0.342783	0.732729	0.39112	0.713806	0.541771	0.510516	0.785513	0.637791	0.393885	0.690409	0.517804	0.200928	0.810724	0.988398	0.58965	0.770505	0.524516	0.593459	0.749341	0.871273
-15	0.668216	0.551396	0.20942	0.15899	0.156558	0.565875	0.601475	0.319353	0.59405	0.93199	0.764796	0.510168	0.902661	0.471203	0.528702	0.687143	0.540752	0.240565	0.777514	0.909182	0.931242	0.822195	0.547387	0.711556	0.948963	1
-10	1	0.676085	0.267559	0.43995	0.160007	0.672329	0.586779	0.500753	0.652211	0.526363	0.844502	0.805589	0.600509	0.878511	0.744231	0.592737	1	0.502318	1	0.851765	0.900945	1	0.593492	0.693353	0.992568	0.943968
-5	0.928257	0.865582	0.29813	0.467957	0.331682	0.746637	0.211838	0.603067	0.537203	0.884437	0.830825	0.892001	0.568502	0.920977	0.87174	0.67705	0.833345	0.567725	0.92145	0.660327	1	0.951035	0.974635	1	0.758025	0.815166
0	0.938212	1	0.184833	0.951749	1	0.573322	0.514936	0.469251	0.241038	1	0.941883	1	0.905341	0.873278	1	0.796596	0.671339	1	0.771799	0.723729	0.864022	0.869592	0.856174	0.90099	1	0.768324
5	0.396294	0.600168	0.204917	0.64573	0.70111	0.823962	0.621086	1	0.357432	0.648786	1	0.720036	0.569336	0.99419	0.831972	0.724426	0.810441	0.660082	0.557708	0.710378	0.977308	0.964887	1	0.958618	0.776257	0.738115
10	0.674081	0.178574	0.269503	1	0.804829	1	0.487912	0.367665	0.914394	0.924243	0.791213	0.831611	0.734143	1	0.794613	0.568191	0.672395	0.853541	0.461429	0.588634	0.953778	0.747843	0.977178	0.988949	0.906165	0.762735
15	0.346826	0.05541	0.369477	0.596512	0.443562	0.480377	0.536285	0.684633	1	0.417588	0.405779	0.422202	1	0.633298	0.516993	0.71102	0.350943	0.515612	0.194218	0.500086	0.561413	0.702022	0.902214	0.854448	0.416596	0.688979
20	0.339186	0.19293	0.414656	0.688983	0.597003	0.035779	0.782909	0.560107	0.965014	0.73737	0.438973	0.165042	0.685582	0.51781	0.530725	0.788231	0.424272	0.789028	0.028292	0.647221	0.599998	0.856772	0.888629	0.936105	0.267086	0.642707
25	0.134377	0.020911	0.415707	0.295453	0.653445		1	0.393248	0.692428	0.95765	0.563011	0.044391	0.413561	0.413726	0.337327	0.648151	0.553973	0.509592		0.575073	0.894921	0.566738	0.661528	0.45874	0.061891	0.807124
30	0.174875	0.023183	0.150137	0.058795	0.652295		0.333868	0.2527	0.301094	0.487717	0.208229		0.44267	0.477036	0.326354	0.771307	0.198991	0.225282		0.606053	0.693413	0.957333	0.654317	0.186917		0.583147
35	0.377958	0.13224	0.272653	0.009667	0.048815		0.009787	0.219055	0.14975	0.000807			0.572343	0.355097	0.322978	1	0.086516	0.592564		0.462273	0.40109	0.461969	0.617358			0.587807
40	0.33078	0.097243	0.489836	0.022368			0.037488	0.296106	0.193376	0.030035			0.599866	0.269978	0.131299	0.752458	0.109139			0.356875	0.349564	0.596652	0.666862			0.473032
45	0.159004	0.074195	0.124639				0.081506	0.31279		0.053397			0.702187	0.115801	0.141756	0.619223				0.405253	0.179461		0.703133			0.395398
50	0.320129	0.077825	0.137191				0.187516	0.459382		0.103219			0.22289	0.094447	0.067529	0.57793				0.176244	0.009093		0.614487			0.24838
55	0.099174		0.030114				0.128135	0.585094		0.211734			0.272249	0		0.473217				0.049724	0.006725		0.598963			0.28053
60			0.047069				0.202778	0.54638		0.209421			0.254509			0.290665				0.123816	0.003623		0.667498			0.305494
65							0.022335			0.120917			0.118574							0.057965			0.491993			0.384767
