# Supplementary material for: Spatiotemporal dissection of the Golgi apparatus and the ER-Golgi intermediate compartment in budding yeast
Source: eLife journal article supplement (doi:10.7554/elife.92900), 2024-02-28
Supplement: supp1 [file elife-92900-supp1-v1.pdf]

|                  |                                                               |     |
|------------------|---------------------------------------------------------------|-----|
| <b>Consensus</b> | -----XXGXXXXXKXXXXXXXXFXLLXXGXXXVHGXD-----                    |     |
| yeast Emp46      | MTTRKTASSLQLLGKITGKAGTKQKKNFINGLIWLYMCVWVHGKVTQKDEL-----      | 54  |
| yeast Emp47      | -----MMMLITMKSTVLLSVFTVLATWAGLLEAHPLGDTSDAS-----              | 38  |
| human ERGIC-53   | -----MAGSRQRGLRARVRPLFCALLLSLGRF-VRGDGVGGDPAVALPHR            | 44  |
| <b>Consensus</b> | KXXXXYSL--PXL---XXKXXXXWXXGXXALEEGRIVLTPX-KNXXKGSLLWKXXXXX    |     |
| yeast Emp46      | KWNLKGYSL--PNLLEVTDDQKELSQWTLGDKVKLEEGRFVLTGP-KNTKGSLLWKPEYSI | 111 |
| yeast Emp47      | KLSSDYSL--PDLI---NARKVPNNWQTGEQASLEEGRIVLTSK-QNSKGSLLWKQGFDL  | 92  |
| human ERGIC-53   | RFEYKYSFKGPHLV---QSDGTVPFWAHAGNAIPSSDQIRVAPSLKSQRGSVWTKTKAAF  | 101 |
| <b>Consensus</b> | KDXXTEWTFRSXGXGXGXTXGGLAFWXXQ-XXNGXXXXLFGGXX-XXNGLXILDXDXL    |     |
| yeast Emp46      | KDAMTIEWTFRSFGRGSGTKGGLAFWLKQ-GNEGDSLELFGGSSKFFNGLMILLRLLDDKL | 170 |
| yeast Emp47      | KDSFTMEWTFRSVGYSGQTDGGISFWFVQDSNVPRDKQLYNGPV-NYDGLQLLDVNNGPL  | 151 |
| human ERGIC-53   | EN-WEVEVTFRVTGRGRIGADGLAIWYAE--NQGLEGPVFGSAD-LWNGVGIFFDSFDND  | 157 |
| <b>Consensus</b> | G----PXXXXLNDGQKXXDXXXXYXQXFAASCLXXYQDSXVPSTXRTYX-----XXD     |     |
| yeast Emp46      | G----ESVTAYLNDGTDLDIESSPY---FASCLFQYQDSMVPSTLRLTYN-----PLD    | 217 |
| yeast Emp47      | G----PTLRGQLNDGQKPV-DKTKIYDQSFASCLMGYQDSSVPSTIRVTYD-----LED   | 200 |
| human ERGIC-53   | GKKNPAIVIIIGNNGQIHYDHQNDGASQALASCQRDFRNKPYVRAKITYYQNTLTVMIN   | 217 |
| <b>Consensus</b> | NXXLLKXQXDNXVCFQTRKVXFXSGXFRIGXSAXNGAXXXXXESFEILKMQLXX-GVIED  |     |
| yeast Emp46      | NHLLKLQMDNRVCFQTRKVKFMGSSPFRIGTSAINDA---SKESFEILKMKLYD-GVIED  | 273 |
| yeast Emp47      | DNLLKQVDNKKVCFQTRKVRFP-SGSYRIGVTAQNGAVNNNAESFEIFKMQFFN-GVIED  | 258 |
| human ERGIC-53   | NGFTPKNDYEFCAKVENMIIPAQGHF--GISAATGGLADDHVDLSLTFQLTEPGKEPP    | 275 |
| <b>Consensus</b> | SLIPNVNMGQPKXXTKXIXXQTGXEKXXEKX-----PFXXXXESITXXEL---F        |     |
| yeast Emp46      | SLIPNVNPMGQPRVVTKVINSQTGEESFREKM-----PFSDKEESITSNEL---F       | 320 |
| yeast Emp47      | SLIPNVNAMGQPKLITKYIDQQTGKEKLIKT-----AFDADKDKITNYEL---Y        | 305 |
| human ERGIC-53   | TPDKEISEKEKEKYQEEFEHFQQELDKKKEEFQKGHPDLQGQPAEEIFESVGDRELQVF   | 335 |
| <b>Consensus</b> | EKXNR--LEGKILANDIDXLL-----XKLNXXVVKX                          |     |
| yeast Emp46      | EKMNK--LEGKIMANDIDPLL-----RKMNKIVEN                           | 348 |
| yeast Emp47      | KKLDL--VEGKILANDINALE-----TKLNDVIKV                           | 333 |
| human ERGIC-53   | EGQNRIHLEIKQLNRQLDMILDEQRRYVSSLTEEISKRGAGMPGQHGQITQQELDTVVKT  | 395 |
| <b>Consensus</b> | QXELLXXXXXXXXXX--PXXLXKGXDDSDXXXXEXFQDFLSINXXLXXVXXE----      |     |
| yeast Emp46      | ERELIQRL-----RPLLDLKKTAISDDS-----FQDFLSMNANLDRLIKE----        | 388 |
| yeast Emp47      | QQELLSFMTTITKQLSSKPPANNEKGTSTDDAIAEDKENFKDFLSINQKLEKVLVE----  | 389 |
| human ERGIC-53   | QHEILRQVNEMKNSM--SETVRLVSGMQHPGSAGGVYETTQHFIDIKEHLHIVKRDIDNL  | 453 |
| <b>Consensus</b> | -QEKXRXKXXGXXPXXDEIXSKXXWLXXLIFIMLXXAYMFRIXQEIXXKXKLL         |     |
| yeast Emp46      | -QEKIRQDAKLYGKQTKGHDEIFSKISVWLALLIFIMITLAYMFRIHQDIKKVKLL      | 444 |
| yeast Emp47      | -QEKYREATKRHGQDGPVQVEIARKLMIWLLPLIFIMLVMAYYTFRIRQEIIKTKLL     | 445 |
| human ERGIC-53   | VQRNMPSEKPKCELPFPFSPCLSTVHFIIFVVVQTVLFIGYIMYRSQQEAAAKFF       | 510 |
