# Supplementary material for: Spatiotemporal dissection of the Golgi apparatus and the ER-Golgi intermediate compartment in budding yeast
Source: eLife. 2024 Mar 19;13:e92900. doi: 10.7554/eLife.92900 (PMC10950332; doi:10.7554/eLife.92900)
Supplement: Supplementary file 2. [file elife-92900-supp2.xlsx]

## Sheet: S2
Supplementary file 2. Yeast strains used in this study.
Strain	Genotype	Source
YPH499	MATa ura3-52 lys2-801 ade2-101 trp1-Δ63 his3-Δ200 leu2-Δ1	1
BY4741	MATa his3Δ1 leu2Δ0 met15Δ0 ura3Δ0	2
3-E11	BY4741 erg6D::kanMX4	2
01-F10	BY4741 GEA2-GFP(S65T)::HIS3MX6	3
38-E4	BY4741 APL6-GFP(S65T)::HIS3MX6	3
42-A11	BY4741 ERD2-GFP(S65T)::HIS3MX6	3
12-D10	BY4741 GGA1-GFP(S65T)::HIS3MX6	3
MIY8	YPH499 ADE2::pRS402 MNN9-mCherry::natNT2	4
KKY706	YPH499 ADE2::pRS402 SEC13-2xmCherry::hphNT1	This study
TTY32	YPH499 ADE2::pRS402 MNN9-mCherry::natNT2 GEA2-GFP(S65T)::kanMX6	This study
TTY36	YPH499 ADE2::pRS402 MNN9-mCherry::natNT2 APL6-GFP(S65T)::kanMX6	This study
TTY38	YPH499 ADE2::pRS402 SEC21-2xmCherry::hphNT1 APL6-GFP(S65T)::kanMX6	This study
TTY39	YPH499 ADE2::pRS402 GEA2-2xmCherry::hphNT1	This study
TTY52	YPH499 ADE2::pRS402 MNN9-mCherry::natNT2 SEC21-2xyEGFP::kanMX6	This study
TTY57	BY4741 ERD2-GFP(S65T)::HIS3MX6 MNN9-mCherry::natNT2	This study
TTY56	BY4741 erg6D::kanMX4 MNN9-mCherry::natNT2	This study
TTY59	BY4741 erg6D::kanMX4 GRH1-2xmCherry::hphNT1	This study
TTY60	YPH499 ADE2::pRS402 MNN9-mCherry::natNT2 GRH1-2xyEGFP::kanMX6	This study
TTY61	YPH499 ADE2::pRS402 GRH1-2xmCherry::hphNT1	This study
TTY63	YPH499 ADE2::pRS402 SEC13-2xmCherry::hphNT1 GRH1-2xEGFP::kanMX6	This study
TTY64	BY4741 erg6D::kanMX4 SEC13-mCherry::natNT2	This study
1. Sikorski, R.S., and Hieter, P. 1989. A system of shuttle vectors and yeast host strains designed for efficient manipulation of DNA in Saccharomyces cerevisiae. Genetics. 122:19-27.
2. Brachmann, C.B., Davies, A., Cost, G.J., Caputo, E., Li, J., Hieter, P., and Boeke, J.D. 1998. Designer deletion strains derived from Saccharomyces cerevisiae S288C: a useful set of strains and plasmids for PCR-mediated gene disruption and other applications. Yeast. 14:115-132.
3. Huh, W.K., Falvo, J.V., Gerke, L.C., Carroll, A.S., Howson, R.W., Weissman, J.S., and O'Shea, E.K. 2003. Global analysis of protein localization in budding yeast. Nature. 425:686-691.
4. Ishii, M., Suda, Y., Kurokawa, K., and Nakano, A. 2016. COPI is essential for Golgi cisternal maturation and dynamics. J. Cell Sci.129:3251-3261.
