# Supplementary material for: Spatiotemporal dissection of the Golgi apparatus and the ER-Golgi intermediate compartment in budding yeast
Source: eLife. 2024 Mar 19;13:e92900. doi: 10.7554/eLife.92900 (PMC10950332; doi:10.7554/eLife.92900)
Supplement: Supplementary file 3. [file elife-92900-supp3.xlsx]

## Sheet: S3
Supplementary file 3. Yeast plasmids used in this study.
Plasmid name	Description	Source
pRS402	ADE2, integration	1
pFA6a-GFP(S65T)-KanMX6	PCR template	2
pFA6a-2xyEGFP-KanMX6	PCR template	3
pFA6a-2xmCherry-hphNT1	PCR template	3
pRS316-EMP46p-EGFP-EMP46	URA3, CEN	4
pRS314-ADH1p-GFP(S65T)-YPT1	TRP1, CEN	5
pRS314-TDH3p-EGFP-RER1	TRP1, CEN	6
pRS316-TDH3p-EGFP-RER1	URA3, CEN	6
pRS314-TDH3p-iRFP713-RER1	TRP1, CEN	This study
pRS316-TPI1p-EGFP-SED5	URA3, CEN	This study
pRS316-VRG4p-GFP(S65T)-VRG4	URA3, CEN	This study
pRS314-ADH1p-MNN2-GFP(S65T)	TRP1, CEN	This study
pRS316-ADH1p-MNN2-yEGFP	URA3, CEN	This study
pRS316-ADH1p-GEA1-yEGFP	URA3, CEN	This study
pRS316-ADH1p-GNT1-GFP(S65T)	URA3, CEN	7
pRS314-ADH1p-GFP(S65T)-TLG2	TRP1, CEN	8
pRS316-ADH1p-SYS1-iRFP713	URA3, CEN	9
pRS314-ADH1p-SEC7-GFP(S65T)	TRP1, CEN	This study
pRS316-ADH1p-SEC7-tagRFP	URA3, CEN	8
pRS316-ADH1p-SEC7-iRFP713	URA3, CEN	8
pRS314-ADH1p-EGFP-IMH1	TRP1, CEN	This study
pRS415-Kar2(1-45)-mCherry-FEHDEL	LEU2, CEN	This study
1. Brachmann, C.B., Davies, A., Cost, G.J., Caputo, E., Li, J., Hieter, P., and Boeke, J.D. 1998. Designer deletion strains derived from Saccharomyces cerevisiae S288C: a useful set of strains and plasmids for PCR-mediated gene disruption and other applications. Yeast. 14:115-132.
2. Longtine, M.S., McKenzie, A. 3rd, Demarini, D.J., Shah, N.G., Wach, A., Brachat, A., Philippsen, P., and Pringle, J.R. 1998. Additional modules for versatile and economical PCR-based gene deletion and modification in Saccharomyces cerevisiae. Yeast. 14:953-961.
3. Suzuki, K., Akioka, M., Kondo-Kakuta, C., Yamamoto, H., and Ohsumi, Y. 2013. Fine mapping of autophagy-related proteins during autophagosome formation in Saccharomyces cerevisiae. J. Cell Sci. 126:253425-253444.
4. Sato K., and Nakano A. 2002. Emp47p and its close homolog Emp46p have a tyrosine-containing endoplasmic reticulum exit signal and function in glycoprotein secretion in Saccharomyces cerevisiae. Mol. Biol. Cell. 13:2518-2532.
5. Suda, Y., Kurokawa, K., Hirata, R., and Nakano, A. 2013. Rab GAP cascade regulates dynamics of Ypt6 in the Golgi traffic. Proc. Natl. Acad. Sci. U S A. 110:18976-18981.
6. Sato, K., Sato, M., and Nakano, A. 2003. Rer1p, a retrieval receptor for ER membrane proteins, recognizes transmembrane domains in multiple modes. Mol. Biol. Cell. 14:3605-3616.
7. Ishii, M., Suda, Y., Kurokawa, K., and Nakano, A. 2016. COPI is essential for Golgi cisternal maturation and dynamics. J. Cell Sci.129:3251-3261.
8. Tojima, T., Suda, Y., Ishii, M., Kurokawa, K., and Nakano A. 2019. Spatiotemporal dissection of the trans-Golgi network in budding yeast. J. Cell Sci. 132:jcs231159.
9. Kurokawa, K., Osakada, H., Kojidani, T., Waga, M., Suda, Y., Asakawa, H., Haraguchi, T., and Nakano, A. 2019. Visualization of secretory cargo transport within the Golgi apparatus. J. Cell Biol. 218:1602-1618.
