# Supplementary material for: Spatiotemporal dissection of the Golgi apparatus and the ER-Golgi intermediate compartment in budding yeast
Source: eLife. 2024 Mar 19;13:e92900. doi: 10.7554/eLife.92900 (PMC10950332; doi:10.7554/eLife.92900)
Supplement: Supplementary file 4. [file elife-92900-supp4.xlsx]

## Sheet: S4
Supplementary file 4. Yeast strains and plasmids used in each experiment.
Experiment (Figure number)	Strain(s) and plasmid(s)
Fig. 1A-E; Fig. 1–supplement 1A,F; Fig. 1–supplement 2	MIY8 with pRS316-EMP46p-EGFP-EMP46
Fig. 1F-J; Fig. 1–supplement 1B,F	MIY8 with pRS314-ADH1p-GFP-YPT1
Fig. 1K-N; Fig. 1–supplement 1C,F	MIY8 with pRS314-TDH3p-EGFP-RER1
Fig. 1O-R; Fig. 1–supplement 1D,F	TTY57
Fig. 1S-V; Fig. 1–supplement 1E,F	YPH499 ADE2::pRS402 with pRS316-EMP46p-EGFP-EMP46 and pRS314-TDH3p-iRFP-RER1
Fig. 2A-D; Fig. 2–supplement 1A,D	TTY60
Fig. 2E-H; Fig. 2–supplement 1B,D	TTY61 with pRS314-TDH3p-EGFP-RER1
Fig. 2I-L; Fig. 2–supplement 1C,D	TTY61 with pRS314-ADH1p-GFP-YPT1
Fig. 3A-D; Fig. 3 supplement 1A,E	MIY8 with pRS316-TPI1p-EGFP-SED5
Fig. 3E-H; Fig. 3–supplement 1B,E	MIY8 with pRS316-VRG4p-GFP-VRG4
Fig. 3I-L; Fig. 3–supplement 1C,E	TTY52
Fig. 3M-P; Fig. 3–supplement 1D,E	MIY8 with pRS314-ADH1p-MNN2-GFP
Fig. 4	TTY63
	KKY706 with pRS314-TDH3p-EGFP-RER1
	KKY706 with pRS316-TPI1p-EGFP-SED5
	KKY706 with pRS316-VRG4p-GFP-VRG4
	KKY706 with pRS314-ADH1p-SEC7-GFP
Fig. 5A	TTY59
	3-E11 with pRS316-TDH3p-EGFP-RER1
	3-E11 with pRS316-TPI1p-EGFP-SED5
	3-E11 with pRS316-VRG4p-GFP-VRG4
	3-E11 with pRS316-ADH1p-MNN2-EGFP
Fig. 5B	3-E11 with pRS415-Kar2(1-45)-mCherry-FEHDEL and pRS316-VRG4p-GFP-VRG4
Fig. 5C	TTY59 with pRS316-TDH3p-EGFP-RER1
Fig. 5D	TTY59 with pRS316-TPI1p-EGFP-SED5
Fig. 5F	3-E11 with pRS316-TPI1p-EGFP-SED5
Fig. 5G	3-E11 with pRS316-VRG4p-GFP-VRG4
Fig. 5–supplement 1	TTY64 with pRS316-TDH3p-EGFP-RER1
Fig. 6A-D; Fig. 6–supplement 1A,C	YPH499 ADE2::pRS402 with pRS316-ADH1p-SYS1-iRFP and pRS314-ADH1p-GFP-YPT1
Fig. 6E-H; Fig. 6–supplement 1B,C	YPH499 ADE2::pRS402 with pRS316-ADH1p-SEC7-iRFP and pRS314-ADH1p-GFP-YPT1
Fig. 6I, J	MIY8 with pRS316-ADH1p-SEC7-iRFP and pRS314-ADH1p-GFP-YPT1
Fig. 7A-D; Fig. 7–supplement 1A,F	MIY8 with pRS316-ADH1p-GEA1-EGFP
Fig. 7E-H; Fig. 7–supplement 1B,F	TTY32
Fig. 7I-L; Fig. 7–supplement 1C,F	TTY39 with pRS316-ADH1p-GNT1-GFP
Fig. 7M-P; Fig. 7–supplement 1D,F	TTY39 with pRS314-ADH1p-GFP-TLG2
Fig. 7Q-T; Fig. 7–supplement 1E,F	01-F10 with pRS316-ADH1p-SEC7-tagRFP
Fig. 8A-D; Fig. 8–supplement 1A,D	YPH499 ADE2::pRS402 with pRS314-ADH1p-EGFP-IMH1 and pRS316-ADH1p-SYS1-iRFP
Fig. 8E-H; Fig. 8–supplement 1B,D	12-D10 with pRS316-ADH1p-SEC7-tagRFP
Fig. 8I,J	TTY36
	TTY38
	38-E4 with pRS316-ADH1p-SYS1-iRFP
	38-E4 with pRS316-ADH1p-SEC7-tagRFP
Fig. 8K-O; Fig. 8–supplement 1C,D; Fig. 8–supplement 2	38-E4 with pRS316-ADH1p-SYS1-iRFP
